1 **Direct proteolytic control of an extracytoplasmic function RNA polymerase sigma factor**

2 Bohdan Bilyk<sup>1</sup>, Sora Kim<sup>2</sup>, Tania A. Baker<sup>2,3</sup>, Ryan F. Seipke<sup>1\*</sup>

3

4 <sup>1</sup>Astbury Centre for Structural Molecular Biology, Faculty of Biological Sciences, University of

5 Leeds, Leeds, UK

6 <sup>2</sup>Department of Biology, Massachusetts Institute of Technology, Cambridge, MA, USA

7 <sup>3</sup>Howard Hughes Medical Institute, Chevy Chase, MD, USA

8

9 **\*Corresponding author:**

10 Ryan F. Seipke

11 E-mail: r.seipke@leeds.ac.uk

12

13 **Keywords:** *Streptomyces*; regulation of secondary metabolism; antimycin; ECF sigma factors;

14 **proteolysis; ClpXP**

## 15 **Abstract**

16           The survival of any microbe relies upon its ability to respond to environmental change. Use  
17 of Extra Cytoplasmic Function (ECF) RNA polymerase sigma ( $\sigma$ ) factors is a major strategy  
18 enabling such signal transduction. *Streptomyces* species harbour a large number of ECF  $\sigma$  factors;  
19 nearly all of which regulate genes required for morphological differentiation and/or response to  
20 environmental stress, except for  $\sigma^{\text{AntA}}$ , which regulates starter-unit biosynthesis in the production of  
21 antimycin, an anticancer compound. Unlike a canonical ECF  $\sigma$  factor, whose activity is regulated by  
22 a cognate anti- $\sigma$  factor,  $\sigma^{\text{AntA}}$  is an orphan, raising intriguing questions about how its activity may  
23 be controlled. Here, we reconstitute *in vitro* ClpXP proteolysis of  $\sigma^{\text{AntA}}$ , but not a variant lacking a  
24 C-terminal di-alanine motif. Furthermore, we show that the abundance of  $\sigma^{\text{AntA}}$  *in vivo* is enhanced  
25 by removal of the ClpXP recognition sequence, and that levels of the protein rise when cellular  
26 ClpP-protease activity is abolished. These data establish direct proteolysis as an alternative and thus  
27 far unique control strategy for an ECF RNA polymerase  $\sigma$  factor and expands the paradigmatic  
28 understanding of microbial signal transduction regulation.

29

## 30 **Importance**

31           Most antibiotics are derived from secondary metabolites produced by *Streptomyces* species.  
32 The recent rise in the number of bacterial infections resistant to antibiotics has led to renewed  
33 interest in discovery of new secondary metabolites produced by these microbes. An average species  
34 of *Streptomyces* harbours ~30 biosynthetic pathways, but the majority of them are not in the  
35 laboratory. A key approach is therefore activation of these “silent” pathways, but new insights into  
36 how their expression is regulated are required. Our findings reveal that the ECF  $\sigma$  factor ( $\sigma^{\text{AntA}}$ ) that  
37 regulates antimycin biosynthesis lacks an anti- $\sigma$  partner and instead is controlled by the Clp-  
38 protease system. These data establish direct proteolysis as a novel strategy for the control of ECF  
39 RNA polymerase  $\sigma$  factors and will aid the pursue of silent biosynthetic pathways.

## 40 **Introduction**

41           The survival of any organism relies upon its ability to respond to environmental change.  
42 This feature is especially true of bacteria, which often live in hostile and fluctuating environments.  
43 *Streptomyces* bacteria thrive in soils. The success of this genus of filamentous, sporulating bacteria  
44 is linked to their complex lifecycle and keen ability to sense and respond to its surroundings.  
45 Notably, a multitude of bioactive secondary or specialised metabolites are produced in response to  
46 environmental cues<sup>1</sup>. More than half of all small molecule therapeutics critical for human health and  
47 wellbeing are derived from or inspired by *Streptomyces* natural products<sup>2</sup>.

48           *Streptomyces* species typically harbor a large number of biosynthetic pathways, but only a  
49 few of them are expressed under common laboratory conditions. The biochemical diversity encoded  
50 by these silent pathways is a tremendous untapped resource for discovery of new antibacterial  
51 agents and other therapeutics. All data available indicates that the production of natural products is  
52 controlled predominantly at the level of transcription. Although there are complex regulatory  
53 cascades that tightly control expression of biosynthetic genes, they are ultimately activated,  
54 repressed or de-repressed by so-called cluster-situated regulators—regulatory protein(s) encoded  
55 within the biosynthetic gene cluster (BGC)<sup>3,4</sup>. Major roadblocks preventing the exploitation of silent  
56 biosynthetic pathways are a lack of insight into their regulation and limited technology for  
57 activating their expression.

58           Antimycins have been known for 70 years and are the founding member of a large class of  
59 natural products widely produced by *Streptomyces* species<sup>5,6</sup>. Recently, antimycins were shown to  
60 be potent and selective inhibitors of the mitochondrial Bcl-2/Bcl-X<sub>L</sub>-related antiapoptotic proteins  
61 that are overproduced by cancer cells and confer resistance to chemotherapeutic agents whose mode  
62 of action is activation of apoptosis<sup>7</sup>. The ~25 kb antimycin (*ant*) BGC harboured by *S. albus* is  
63 composed of 15 genes organised into four polycistronic operons *antAB*, *antCDE*, *antFG* and  
64 *antHIJKLMNO* (Fig. 1)<sup>8,9</sup>. The regulation of this *ant* BGC is unusual compared to other secondary  
65 metabolites. Its expression is regulated by FscRI, a cluster-situated LuxR-family regulator of

66 candidin biosynthesis; FscRI activates expression of *antAB* and *antCDE*<sup>10</sup>. Importantly, *antA* is a  
67 cluster-situated regulator that encodes an Extra Cytoplasmic Function (ECF) RNA polymerase  $\sigma$   
68 factor ( $\sigma^{\text{AntA}}$ ) that activates expression of the remaining operons: *antGF* and *antHIJKLMNO* (Fig.  
69 1)<sup>9</sup>.

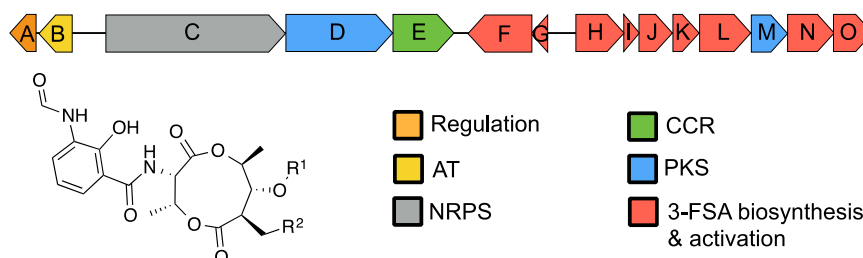

70

71 **Fig. 1** | Schematic representation of the antimycin (*ant*) biosynthetic gene cluster. AT, acyltransferase; NRPS, non-ribosomal peptide synthetase; PKS, polyketide synthase; CCR, crotonyl-CoA carboxylase/reductase, 3-FSA, 3-formamidosalicylate. Antimycins: Antimycin A<sub>1</sub>,  
72 R<sup>1</sup>= COCH(CH<sub>3</sub>)CH<sub>2</sub>CH<sub>3</sub>, R<sup>2</sup>= (CH<sub>2</sub>)<sub>4</sub>CH<sub>3</sub>; Antimycin A<sub>2</sub>, R<sup>1</sup>=COCH(CH<sub>3</sub>)<sub>2</sub>, R<sup>2</sup>= (CH<sub>2</sub>)<sub>4</sub>CH<sub>3</sub>;  
73 Antimycin A<sub>3</sub>, R<sup>1</sup>= COCH<sub>2</sub>CH(CH<sub>3</sub>)<sub>2</sub>, R<sup>2</sup>= (CH<sub>2</sub>)<sub>2</sub>CH<sub>3</sub>; Antimycin A<sub>4</sub>, R<sup>1</sup>= COCH(CH<sub>3</sub>)<sub>2</sub>, R<sup>2</sup>=  
74 (CH<sub>2</sub>)<sub>2</sub>CH<sub>3</sub>.  
75  
76

77

78

79  $\sigma^{\text{AntA}}$ , like all ECF  $\sigma$  factors, is similar to the housekeeping  $\sigma$ <sup>70</sup> family, but only possesses  
80 two of the four highly characteristic sigma domains: domains  $\sigma$ 2 and  $\sigma$ 4; these regions of sigma  
81 bind the -10 and -35 promoter elements, respectively and are sufficient for recruitment of RNA  
82 polymerase<sup>11</sup>. Genes encoding ECF  $\sigma$  factors are almost always co-transcribed with their cognate  
83 anti- $\sigma$  factor<sup>12</sup>. This class of anti- $\sigma$  factors are transmembrane proteins that selectively bind to and  
84 inactivate a partner  $\sigma$  factor until its release is stimulated, usually by an exogenous signal<sup>12,13</sup>. After  
85 the  $\sigma$  factor is released it recruits RNA polymerase to express a defined regulon that usually  
86 includes the  $\sigma$  factor-anti- $\sigma$  factor operon itself, which thus establishes a positive auto-feedback  
87 loop in the presence of the inducing stimulus. *Streptomyces* species encode a large number of ECF  
88  $\sigma$  factors (>30 per strain) and nearly all of these regulate genes required for morphological  
89 differentiation and/or response to environmental stress and, in contrast to  $\sigma^{\text{AntA}}$ , are not dedicated  
90 regulators of one biosynthetic pathway<sup>9</sup>. In addition, unlike the canonical ECF  $\sigma$  factors, whose

91 activities are controlled by cognate anti- $\sigma$  factors,  $\sigma^{\text{AntA}}$  appears to be an “orphan”, lacking such a  
92 regulatory partner protein and thus has created curiosity about how its activity is controlled.

93 The Clp-protease system is essential for normal bacterial proteostasis and is best  
94 characterised in *Escherichia coli*<sup>14,15</sup>. The Clp protease is a multi-enzyme complex composed of a  
95 barrel-shaped peptidase, ClpP and a regulatory enzyme, either ClpA or ClpX (or ClpC in some  
96 organisms). ClpA and ClpX (and ClpC) are all AAA+-family protein unfoldases that recognise an  
97 N- and/or C-terminal recognition signal (degron) and utilise ATP to unfold and translocate proteins  
98 to the peptidase chamber where they are degraded into short peptides<sup>16</sup>. In *Streptomyces* species, the  
99 peptidase is specified by two genes instead of one and is redundantly encoded<sup>17</sup>. The primary  
100 peptidase is encoded by *clpPIP2*, whose corresponding proteins form a complex with ClpX or  
101 ClpA to facilitate normal proteostasis; the second peptidase is encoded by *clpP3P4*, but its  
102 expression only occurs when the primary system is compromised<sup>18,19</sup>. The best understood degron  
103 is the SsrA tag from *E. coli* (AANDENYALAA), which is added co-translationally to polypeptides  
104 stalled on ribosomes<sup>20,21</sup>. The *E. coli* SsrA tag has been comprehensively studied and the C-terminal  
105 Ala-Ala-COO<sup>-</sup> of this motif is essential for proteolysis by ClpXP<sup>22</sup>. Intriguingly, the C-terminus of  
106  $\sigma^{\text{AntA}}$  harbours the sequence Ala-Ala-COO<sup>-</sup>, which previously led us to speculate that ClpXP may  
107 modulate its level/activity<sup>9</sup>.

108 Here, we reconstitute ClpXP proteolysis of  $\sigma^{\text{AntA}}$  *in vitro* and show that it is dependent upon  
109 the C-terminal Ala-Ala. We also show that the abundance of  $\sigma^{\text{AntA}}$  *in vivo* is higher when Ala-Ala is  
110 changed to Asp-Asp and that abundance  $\sigma^{\text{AntA}}$  is elevated in the absence of genes encoding the  
111 primary peptidase, ClpP and its unfoldases, ClpA and ClpX. These data establish direct proteolysis  
112 as an alternative, and thus far unique, control strategy of ECF RNA polymerase  $\sigma$  factors,  
113 expanding the paradigmatic understanding of microbial signal transduction regulation.

## 114 Results

115  $\sigma^{\text{AntA}}$  orthologues are a new subfamily of ECF  $\sigma$  factor that regulate production of the  
116 antimycin biosynthetic starter unit. Since its initial discovery six years ago, more than 70 *ant*  
117 BGCs have been identified within actinomycete genera, including in *Actinobacteria*, *Actinospica*,  
118 *Saccharopolyspora*, *Streptacidiphilus* and *Streptomyces*<sup>5</sup>. Each of these BGCs harbours a single  
119 regulator,  $\sigma^{\text{AntA}}$  (53-100% shared amino acid identity across all orthologues), which lacks a cognate  
120 anti- $\sigma$  factor partner<sup>5,9</sup>. Our previous work with *S. albus* S4 established that  $\sigma^{\text{AntA}}$  orthologues  
121 comprise a new subfamily of ECF  $\sigma$  factors<sup>9,23</sup>. We demonstrated  $\sigma^{\text{AntA}}$  is required for expression of  
122 *antFG* and *antHIJKLMNO*, which encode a standalone ketoreductase (AntM) and proteins required  
123 for the production/activation of the starter unit, 3-formamidosalicylate (3-FSA) (Fig. 1). We also  
124 mapped the transcriptional start sites and identified conserved promoter sequences for these operons  
125 in all known antimycin BGCs at the time<sup>9</sup>. The conservation of  $\sigma^{\text{AntA}}$  and target promoters within  
126 *ant* BGCs from taxonomically diverse species, suggests that  $\sigma^{\text{AntA}}$ -mediated regulation of these  
127 genes is direct. To verify this hypothesis, we performed ChIP-seq with a *S. albus* S4  $\Delta antA$   
128 mutant complemented with an N-terminal 3xFLAG-tagged version of  $\sigma^{\text{AntA}}$ . The number of reads  
129 that mapped to the promoters of *antGF* and *antHIJKLMNO* was enriched for both biological  
130 replicates of  $\Delta antA/3x\text{FLAG-}antA$  compared to that of the wild-type mock-immunoprecipitated  
131 control, indicating that  $\sigma^{\text{AntA}}$  directly activates the production of the 3-FSA starter unit during  
132 antimycin biosynthesis (Fig. 2).

133

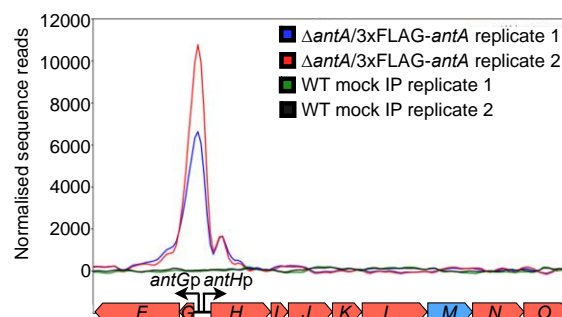

134 **Fig. 2 | 3xFLAG- $\sigma^{\text{AntA}}$  binds to the *antGF* and *antHIJKLMNO* promoters *in vivo*.** Shown is a  
135 graphical representation of normalised sequence reads mapped to the intergenic region of *antG*-  
136 *antH* (shown at bottom). The genomic coordinates depicted are nucleotides 43,148 to 51,448 of  
137 contig CADY01000091.1 of the *S. albus* S4 genome<sup>49</sup>. WT, wild-type; IP, immunoprecipitation.

138  
139  **$\sigma^{\text{AntA}}$  is degraded by the ClpXP protease *in vitro*.** The activity of almost all characterised  
140 ECF  $\sigma$  factors are modulated by a cognate anti- $\sigma$  factor, which is typically a small transmembrane  
141 protein co-encoded within the same operon, so the absence of an anti- $\sigma$  factor partner to control  
142  $\sigma^{\text{AntA}}$  is particularly intriguing, and makes  $\sigma^{\text{AntA}}$  be considered an orphan regulatory protein. An  
143 inspection of  $\sigma^{\text{AntA}}$  amino acid sequences revealed a C-terminal Ala-Ala in 67 out of the 71  
144 orthologues (Supplementary Fig. 1). A C-terminal Ala-Ala is an important component of a common  
145 class of degrons for the ClpXP protease<sup>22</sup>. This observation led us to hypothesise that the activity of  
146  $\sigma^{\text{AntA}}$  could be modulated by proteolysis instead of by an anti- $\sigma$  factor. To test this hypothesis, we  
147 performed *in vitro* proteolysis. Previous work indicated that *S. albus* S4  $\sigma^{\text{AntA}}$  was insoluble when  
148 overproduced by *E. coli*, so we pursued the overproduction and purification of the orthologue from  
149 *Streptomyces ambofaciens* ATCC 23877, which is an experimentally demonstrated producer of  
150 antimycins<sup>24</sup>. *S. ambofaciens*  $\sigma^{\text{AntA}}$  (75% shared amino acid identity with *S. albus* S4  $\sigma^{\text{AntA}}$ ) was  
151 purified as an N-terminal (His)<sub>6</sub>-SUMO-fusion protein. The (His)<sub>6</sub>-SUMO tag increases solubility  
152 and eases purification of putative substrates, without altering recognition of C-terminal degrons by  
153 ClpXP. ClpX orthologues from *E. coli* and *S. ambofaciens* possess 60% shared amino acid identity  
154 and therefore likely recognise similar substrates for degradation. Thus, ClpXP from *E. coli* was  
155 purified and its ability to degrade (His)<sub>6</sub>-SUMO- $\sigma^{\text{AntA}}$  was assessed. Degradation of (His)<sub>6</sub>-SUMO-  
156  $\sigma^{\text{AntA}}$  was apparent as early as 2.5 min after addition of ATP and all of the sample was degraded by  
157 15 min (Fig. 3). Substrates of ClpXP become resistant to proteolysis by specific alterations of the  
158 C-terminal Ala-Ala<sup>22</sup>. Therefore, to investigate degradation specificity in the above experiment we  
159 constructed and tested a variant of *S. ambofaciens*  $\sigma^{\text{AntA}}$  in which the C-terminal Ala-Ala was  
160 mutated to Asp-Asp ((His)<sub>6</sub>-SUMO- $\sigma^{\text{AntA-DD}}$ ). Strikingly, the Asp-Asp variant was stable against  
161 ClpXP degradation over the lifetime of the assay (Fig. 3). Thus, the degradation of (His)<sub>6</sub>-SUMO-  
162  $\sigma^{\text{AntA}}$  and the characteristic resistance afforded by the Ala-Ala-to-Asp-Asp mutation demonstrates  
163 that  $\sigma^{\text{AntA}}$  is a direct substrate of ClpXP *in vitro*.

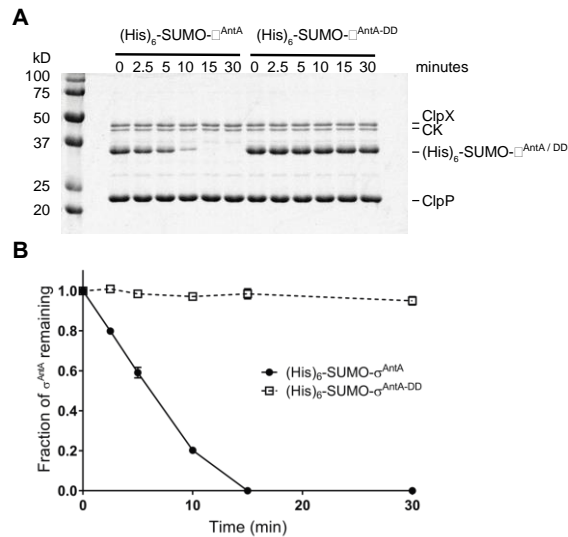

164

165 **Fig. 3 | Proteolysis of *S. ambifaciens*  $\sigma^{\text{AntA}}$  by ClpXP *in vitro*.** (A) SDS-PAGE analysis of  
166 proteolysis reactions containing 37 pmols (His)<sub>6</sub>SUMO- $\sigma^{\text{AntA}}$  or (His)<sub>6</sub>SUMO- $\sigma^{\text{AntA-DD}}$ . (B)  
167 Densitometry analysis SDS-PAGE images for three independent proteolysis experiments. The mean  
168 is plotted and error bars illustrate the standard error of the mean ( $\pm 1$  SEM).  
169

170  $\sigma^{\text{AntA}}$  is degraded by ClpXP protease *in vivo*. To investigate if the *in vitro* degradation  
171  $\sigma^{\text{AntA}}$  demonstrated above is relevant to its regulation *in vivo* we adopted a genetic strategy to assess  
172 the abundance of  $\sigma^{\text{AntA}}$  in mutant strains with defects in Clp-proteolysis. First, we deleted the *clpX*,  
173 *clpP1*, and *clpP2* genes from *S. albus* S4. The resulting mutant underwent a normal developmental  
174 cycle, albeit sporulation was less robust on ISP2 and MS medium (Supplemental Fig. 3). Next  
175 genes encoding the 3xFLAG- $\sigma^{\text{AntA}}$  or 3xFLAG- $\sigma^{\text{AntA-DD}}$  fusion proteins were generated and  
176 introduced into the parental strain and the  $\Delta clpXclpP1clpP2$  mutant so the abundance of these  
177 proteins could be assessed over a developmental time course by Western blotting with anti-FLAG  
178 antisera. This experiment was initially performed with the  $\sigma^{\text{AntA}}$  fusions integrated on the  
179 chromosome under control of the native protein. However, a reliable signal could not be detected  
180 for 3xFLAG- $\sigma^{\text{AntA}}$  and only a trace amount of the Asp-Asp variant was observed, presumably  
181 indicating that the cellular level of  $\sigma^{\text{AntA}}$  is normally low because the native promoter is relatively  
182 weak. The experiment was therefore repeated with 3xFLAG- $\sigma^{\text{AntA}}$  and 3xFLAG- $\sigma^{\text{AntA-DD}}$  expression  
183 driven by a stronger, constitutive promoter, *ermE*<sup>325</sup>. Analysis of the resulting immunoblot revealed  
184 that 3xFLAG- $\sigma^{\text{AntA-DD}}$  was more abundant than 3xFLAG- $\sigma^{\text{AntA}}$  in extracts prepared from vegetative



185 mycelia (14h and 17h) of the parent and  $\Delta clpXclpP1clpP2$  strains (Fig. 4). Strikingly, 3xFLAG-  
186  $\sigma^{\text{AntA}}$  and 3xFLAG- $\sigma^{\text{AntA-DD}}$  could only be detected in extracts from aerial mycelia (24h and 30h) of  
187 the  $\Delta clpXclpP1clpP2$  strain and not the parent; the Asp-Asp variant was also present in greater  
188 relative abundance (Fig. 4). These data support the hypothesis that  $\sigma^{\text{AntA}}$  levels, and thus its ability  
189 to activate gene expression is modulated by the ClpXP protease, however the conspicuous absence  
190 of 3xFLAG- $\sigma^{\text{AntA}}$  and the presence 3xFLAG- $\sigma^{\text{AntA-DD}}$  in protein extracts prepared from the latest  
191 time point suggests the involvement of degradative factor(s) in addition to ClpXP.

192  **$\sigma^{\text{AntA}}$  is degraded by ClpAP protease *in vivo*.** Taken together, the data presented above  
193 establishes that ClpXP likely acts degrades  $\sigma^{\text{AntA}}$  *in vivo*, but also suggested the existence of other  
194 factor(s) that affect  $\sigma^{\text{AntA}}$  levels, especially later in the morphological development cycle. ClpA is  
195 an alternative targeting protein that forms a proteolytic complex with ClpP capable of degrading  
196 SsrA-tagged proteins<sup>21</sup>. Indeed, an overlap in proteins comprising the ClpAP and ClpXP  
197 degradomes has been observed for *E. coli*<sup>26</sup>. Thus, we hypothesised that ClpAP may also be able to  
198 degrade  $\sigma^{\text{AntA}}$ . We therefore generated a  $\Delta clpXclpP1clpP2clpA$  mutant and re-assessed the  
199 abundance of the 3xFLAG- $\sigma^{\text{AntA}}$  and 3xFLAG- $\sigma^{\text{AntA-DD}}$  by immunoblotting as above. Analysis of  
200 the resulting immunoblot revealed that 3xFLAG- $\sigma^{\text{AntA}}$  and 3xFLAG- $\sigma^{\text{AntA-DD}}$  were present in equal  
201 relative abundance within  $\Delta clpXclpP1clpP2$  and  $\Delta clpXclpP1clpP2clpA$  lysate prepared after 14, 17  
202 and 24hrs of growth (Fig. 4). Strikingly, 3xFLAG- $\sigma^{\text{AntA}}$  was observed in lysate prepared after 30hrs  
203 of incubation only for the  $\Delta clpXclpP1clpP2clpA$  strain. Taken together, these *in vivo* data indicate  
204 that  $\sigma^{\text{AntA}}$  is degraded by both the ClpXP and ClpAP proteases.

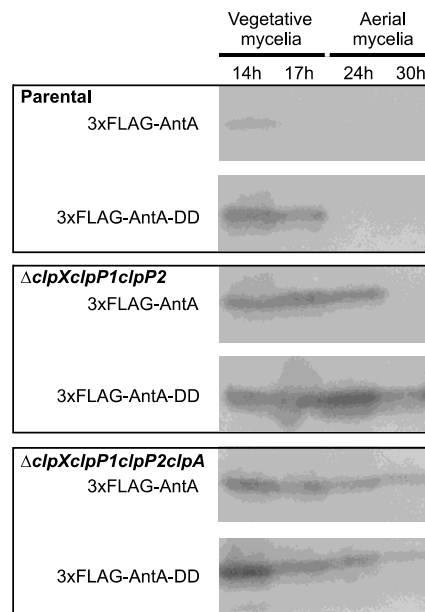

205

206

207

208

209

210

211

**Fig. 4 | The abundance of  $\sigma^{\text{AntA}}$  is enhanced in the absence of the Clp protease *in vivo*.** Cells from the indicated strains were cultivated over a developmental time course on agar media. Protein extracts were generated from 100mg of either vegetative mycelia (14 and 17 hours) or aerial mycelia (24 and 30hours) was harvested and lysed. Thirty micrograms of total protein were analysed by Western blotting with anti-FLAG antisera. The images shown are derived from uncropped original images shown in Supplementary Fig. 4.

## 212 Discussion

213 ECF  $\sigma$  factors are a major component of bacterial signal transduction, are typically involved  
214 in responding to external stimuli and their activity is canonically understood to be controlled via a  
215 cognate anti- $\sigma$  factor protein; the anti- $\sigma$  is usually membrane bound and almost always encoded at  
216 the same locus<sup>12</sup>. In this study, we characterised *in vitro* and *in vivo*, an ECF  $\sigma$  factor named  $\sigma^{\text{AntA}}$   
217 that does not possess any identifiable anti- $\sigma$  factor partner and as a consequence has evolved a  
218 different mechanism of regulation.

219 We established that  $\sigma^{\text{AntA}}$  is a cluster-situated regulator of antimycin biosynthesis and  
220 showed by CHIP-sequencing that it directly binds upstream of genes required for 3-FSA production.  
221 Although abundant within *Streptomyces* species, the activity of ECF  $\sigma$  factors that have been  
222 characterised are involved in responding to environmental stress and/or regulating morphological  
223 differentiation. To our knowledge,  $\sigma^{\text{AntA}}$  is the only ECF  $\sigma$  factor that is a cluster-situated regulator  
224 in the genus *Streptomyces*. Indeed, cluster-situated ECF  $\sigma$  factors have only thus far been observed  
225 within BGCs for lantibiotics produced by so-called rare actinomycetes and these are controlled by  
226 anti- $\sigma$  factors. In *Microbospira corallina*, MibR and  $\sigma^{\text{MibX}}$  regulate microbisporicin biosynthesis  
227 and  $\sigma^{\text{MibX}}$  is controlled by the anti- $\sigma$  factor, MibW<sup>27</sup>; in *Planomonospora alba*, PspR and  $\sigma^{\text{PspX}}$   
228 regulate planosporicin production and  $\sigma^{\text{PspX}}$  is controlled by the anti- $\sigma$  factor, PspW<sup>28</sup>.

229 The C-terminal Ala-Ala present within  $\sigma^{\text{AntA}}$  orthologues served as a clue that instead of an  
230 anti- $\sigma$  factor that ClpXP may regulate  $\sigma^{\text{AntA}}$  activity. We unambiguously demonstrated that ClpXP  
231 degraded  $\sigma^{\text{AntA}}$  *in vitro*, but not an altered  $\sigma^{\text{AntA}}$  variant in which Ala-Ala was changed to Asp-Asp.  
232 We also assessed the level of  $\sigma^{\text{AntA}}$  *in vivo* and showed that it was more abundant within vegetative  
233 mycelia than in aerial mycelia and was partially stabilised by the Asp-Asp mutation, which was  
234 consistent with our previous experiments that showed the *ant* BGC is downregulated at the level of  
235 transcription upon the onset of aerial growth<sup>9</sup>. We demonstrated that the abundance of  $\sigma^{\text{AntA}}$  and the  
236 Asp-Asp variant was higher *in vivo* in a  $\Delta clpXclpP1clpP2$  mutant strain and further so when *clpA*  
237 (orthologous to SCO7532 (*clpC2*)) was deleted. It was surprising that the Asp-Asp mutation did not

238 fully protect  $\sigma^{\text{AntA}}$  from proteolysis *in vivo*, however enhanced abundance of  $\sigma^{\text{AntA-DD}}$  in  
239  $\Delta clpXclpP1clpP2$  and  $\Delta clpXclpP1clpP2clpA$  genetic backgrounds relative to the parent strain is  
240 consistent with previous studies indicating N-terminal and internal motifs can also be important for  
241 substrate recognition by Clp-proteases<sup>26,29</sup>. However, involvement of another protease, such as Lon,  
242 in the degradation  $\sigma^{\text{AntA}}$  cannot be excluded.

243 Direct ClpXP or ClpAP proteolysis of an ECF  $\sigma$  factor, as shown here, has not been  
244 reported previously. However, it has been linked to ECF  $\sigma$  factors in the past, where proteolysis of  
245  $\sigma^{\text{S}}$  in *E. coli* and  $\sigma^{\text{T}}$  in *S. coelicolor* occurs via their association with an adapter protein or peptidase,  
246 respectively<sup>30,31</sup>. In addition, ClpXP proteolysis of the anti- $\sigma$  factors RseA and RsiW enables  
247 expression the  $\sigma^{\text{E}}$  and  $\sigma^{\text{W}}$  regulons in *E. coli* and *Bacillus subtilis*, respectively<sup>32-35</sup>. ClpXP has also  
248 been linked to the turnover of other transcription factor families. For instance, the  $\lambda$  repressor-like  
249 proteins (InterPro ID=IPR010982) PopR and its paralogue ClgR, which participate in a feedback  
250 loop regulating expression of the *clp* genes in *S. lividans*<sup>36,37</sup>, and the global oxygen-sensing  
251 regulator, FNR in *E. coli*<sup>38</sup>.

252 Expression of the *ant* BGC is atypical compared to other BGCs in that it is expressed during  
253 vegetative growth, but downregulated upon the onset of aerial growth. Its expression is cross-  
254 activated by FscRI, a LuxR-family regulator, from the candicidin BGC, which activates expression  
255 of *antBA* and *antCDE*<sup>10</sup>. This regulation in turn enables direct activation of the 3-FSA biosynthetic  
256 operons (*antGF* and *antHIJKLMNO*) by  $\sigma^{\text{AntA}}$ . The cellular level of  $\sigma^{\text{AntA}}$  is antagonised by the Clp-  
257 protease system, for which it is a direct target and is ultimately responsible for clearing residual  
258  $\sigma^{\text{AntA}}$  when FscRI is inactivated following the onset of morphological differentiation<sup>10</sup>. The above  
259 model (Supplementary Fig. 5) is intriguing and begs the question why is it important for  $\sigma^{\text{AntA}}$  to be  
260 actively cleared from cell? One possibility is that aberrant/excess production of 3-FSA is cytotoxic,  
261 however previous experiments in which the *antA* gene was artificially overexpressed did not  
262 adversely impact growth of the organism<sup>9</sup>. An alternative hypothesis for why  $\sigma^{\text{AntA}}$  must be rapidly  
263 removed from the cell is to prevent unnecessary consumption of L-Trp. Biosynthesis of L-Trp is

264 biologically expensive and it is the most chemically complex and least abundant of the 20 common  
265 proteinogenic amino acids<sup>39</sup>. It is tempting to speculate that the evolutionary rationale underpinning  
266 this regulatory strategy is owed to the cell needing to dedicate more of this amino acid to production  
267 of proteins or metabolites involved in development. This is consistent with recent data showing that  
268 deletion of *trpM*, which controls precursor availability for L-Trp biosynthesis in *S. coelicolor* and  
269 presumably all streptomycetes, fails to undergo normal morphological development<sup>40</sup>.

270 In conclusion, here we establish direct proteolysis by the Clp-protease system as an  
271 alternative control strategy for ECF  $\sigma$  factors, which provides a new lens through which to examine  
272 microbial signal transduction and the regulation of natural product biosynthesis in *Streptomyces*  
273 species. Understanding the diversity of regulatory strategies controlling the expression of these  
274 pathways is critical for the development of new tools for exploiting the ‘silent majority’ of  
275 biosynthetic pathways harboured by these organisms.

## 276 **Materials and methods**

277 **Growth media, strains, cosmids, plasmids, and other reagents.** *Escherichia coli* strains  
278 were propagated on Lennox agar (LA) or broth (LB)<sup>41,42</sup> and *Streptomyces albus* S4 strains were  
279 cultivated using LA, LB, and mannitol-soya flour (MS) agar or broth<sup>41</sup>. Development of *clp* mutants  
280 was assessed on MS and ISP2 medium<sup>41</sup>. Culture medium was supplemented with antibiotics as  
281 required at the following concentrations: apramycin, 50 µg/ml; carbenicillin, 100 µg/ml;  
282 chloramphenicol, 25 µg/ml; hygromycin, 50 µg/ml; kanamycin, 50 µg/ml; nalidixic acid, 25 µg/ml.  
283 *Streptomyces* strains were constructed by conjugal mating with *E. coli* ET12567 as previously  
284 described<sup>41</sup>. Enzymes were purchased from New England BioLabs unless otherwise stated, and  
285 oligonucleotides were purchased from Integrated DNA Technologies, Inc. All of the strains,  
286 cosmids, and plasmids used in this study are described in Supplementary Table 1, and all of the  
287 oligonucleotides used are provided in Supplementary Table 2.

288 **Construction of plasmids.** The insert for each plasmid generated in this study was prepared  
289 by PCR amplification with Q5 High-Fidelity DNA polymerase and oligonucleotides containing  
290 restriction sites. PCR-amplified inserts were restricted and cloned into the relevant plasmids cut  
291 with the same enzymes by standard molecular biology procedures. All clones were sequenced to  
292 verify the integrity of insert DNA. The restriction sites used for cloning are provided with the  
293 plasmid descriptions in Supplementary Table 1.

294 **ChIP-seq and bioinformatics analyses.** The *antA* coding sequence was amplified  
295 with RFS629 and RFS630, which contain KpnI and EcoRI restriction sites, respectively. The  
296 restricted PCR product was cloned into pSETNFLAG digested with the same enzymes. The  
297 resulting plasmid was then restricted with NotI and EcoRI to release *ermE*\*p-3xFLAG-*antA*, which  
298 was subsequently cloned into pAU3-45 digested with the same enzymes. pAU3-45-3xFLAG-*antA*  
299 was mobilised to an apramycin-marked  $\Delta antA$  strain<sup>9</sup>. Cultivation of the wild-type and  
300  $\Delta antA$ /pAUNFLAG-*antA* strains for ChIP-seq were performed exactly as described  
301 previously<sup>10</sup>. The pure DNA resulting from immunoprecipitates from two biological replicates of

302 wild-type and  $\Delta antA$ /pAUNFLAG-*antA*, as well non-immunoprecipitated chromosomal DNA, were  
303 sequenced with the Illumina HiSeq3000 platform with 150-nucleotide paired-end reads by the  
304 University of Leeds Next Generation Sequencing Facility at the St. James Teaching Hospital NHS  
305 Trust. The resulting reads were analysed exactly as described previously<sup>10</sup>. The graphic in Figure 2  
306 was generated using DeepTools computeMatrix and plotProfile functions<sup>43</sup>.

307 **Construction of *S. albus* S4 *clp* mutant strains.** All deletions were performed by  
308 mutagenising cosmids using RecET recombineering in *E. coli* followed by their subsequent  
309 mobilisation to *S. albus* strains via conjugal transfer. The *clpXclpP1clpP2*-containing cosmid,  
310 cos117 and *clpA*-containing cosmid, cos251 were obtained by screening a previously constructed *S.*  
311 *albus* S4 Supercos1 cosmid library<sup>8</sup> by PCR using oligonucleotides PBB001 and PBB002 (*clpX*)  
312 and PBB067 and PBB068 (*clpA*). Cos117 and cos251 were mutagenised as required using *E. coli*  
313 recombineering with strain GB05-red<sup>44</sup> and a deletion cassette. Deletion cassettes were generated  
314 by PCR from *paac-apr-oriT*<sup>45</sup> and consisted of the apramycin resistance gene, *aac(3)IV* and a  
315 conjugal origin of transfer (*oriT*), which was flanked by  $\Phi$ C31-*attL* and -*attR* sites for excision of  
316 the cassette. Oligonucleotides used to generate deletion cassettes included 39 nt of homology  
317 upstream or downstream of the target open reading frame(s) and are listed in Supplementary Table  
318 2. The resulting PCR products were digested with DpnI, gel purified and electroporated into  
319 arabinose-induced *E. coli* GB05-red harbouring cos117 or cos251. Transformants were screened for  
320 the presence of mutagenised cosmid by PCR using oligonucleotides listed in Supplementary Table  
321 2 and the integrity of the locus was verified by DNA sequencing. Mutagenised cosmids were  
322 electroporated into *E. coli* ET12567/pUZ8002 and mobilised to a strain of *S. albus* S4 harbouring  
323 an entire antimycin BGC deletion ( $\Delta antall$ ) by conjugation as described<sup>41</sup>. Transconjugants were  
324 screened for apramycin resistance and kanamycin sensitivity. The integrity of apramycin-marked  
325 mutants was verified by PCR using the oligonucleotides listed in Supplementary Table 2. The  
326 apramycin deletion cassette was subsequently excised from the chromosome by conjugal  
327 introduction of pUWLint31, which is a replicative plasmid with a temperature sensitive origin of

328 replication that expresses the  $\Phi$ C31 integrase required for removal of the cassette<sup>45</sup>.  
329 Transconjugants were screened for loss of apramycin resistance and excision of the cassette was  
330 verified by polymorphic shift PCR and DNA sequencing of the product.

331 **Immunoblot analysis.** Spores of parental strain, *S. albus*  $\Delta$ antall,  $\Delta$ clpXclpP1clpP2 and  
332  $\Delta$ clpXclpP1clpP2clpA mutants carrying pPDA or pPDD were grown on SFM agar (buffered with  
333 50mM TES, pH 7.2) covered with cellophane discs. Protein extracts were prepared from mycelia  
334 collected at regular intervals during growth (14h, 17h, 24h and 30h) as follows: 100 mg of cells  
335 were resuspended in 200  $\mu$ l lysis buffer (50 mM sodium phosphate buffer, pH 7.0, 150 mM sodium  
336 chloride, 10 mg/ml lysozyme, cOmplete, Mini, EDTA-free protease inhibitors (Roche) and 100 mg  
337 of 0.1 mm glass beads (PowerLyzer®)) and lysed by vortexing for 30 min at 2000 rpm, 37°C, with a  
338 subsequent incubation for another 30 min at 37°C. The obtained suspension was centrifuged for 20  
339 min at 20,000g at 18°C. Thirty micrograms of the clarified protein extract were subjected to SDS-  
340 PAGE and then transferred to nitrocellulose membrane (pore size 0.2  $\mu$ m) for Western blot  
341 analysis. The membrane was probed with mouse monoclonal ANTI-FLAG® M2-Peroxidase (HRP)  
342 antibody (Sigma), 1:10 000, and the signals were detected using Pierce<sup>TM</sup> 1-Step Ultra TMB  
343 Blotting Solution (Thermo Scientific).

344 **Protein purification and *in vitro* ClpXP proteolysis assays.** The wild-type *antA* gene was  
345 PCR amplified and cloned into the AgeI and HindIII sites of the pET23b-SUMO vector, which  
346 harbours an N-terminal (His)<sub>6</sub>-SUMO tag<sup>46</sup>. The plasmid for production of (His)<sub>6</sub>-SUMO- $\sigma^{\text{AntA-DD}}$   
347 was generated by site-directed mutagenesis (Agilent QuikChange) using primers listed in  
348 Supplementary Table 2. (His)<sub>6</sub>-SUMO- $\sigma^{\text{AntA}}$  and (His)<sub>6</sub>-SUMO- $\sigma^{\text{AntA-DD}}$  were produced by *E. coli*  
349 Rosetta(DE3) (Novagen) grown in LB at 37 °C until OD<sub>600</sub> 0.5, followed by induction with 0.4 mM  
350 IPTG and growth at 18 °C for 16 hours. Cells were resuspended in 50 mM sodium phosphate, pH 8,  
351 1M NaCl, 20 mM imidazole, 10% glycerol, and 1 mM DTT and lysed by french press at 28 kpsi,  
352 followed by treatment with protease inhibitor cocktail set III, EDTA-free (Calbiochem) and  
353 benzonase (Millipore Sigma). (His)<sub>6</sub>-SUMO- $\sigma^{\text{AntA}}$  and (His)<sub>6</sub>-SUMO- $\sigma^{\text{AntA-DD}}$  proteins were



354 purified by Ni-NTA affinity chromatography and Superdex-75 gel filtration and stored in 50 mM  
355 potassium phosphate, pH 6.8, 850 mM KCl, 10% glycerol, and 1 mM DTT. *E. coli* ClpX and ClpP  
356 proteins were purified as described previously<sup>46,47</sup>.

357 *In vitro* ClpXP proteolysis assays were performed at 30 °C by preincubating 0.3 μM ClpX<sub>6</sub>  
358 and 0.8 μM ClpP<sub>14</sub> with ATP regeneration system (4 mM ATP, 50 μg/mL creatine kinase, 5 mM  
359 creatine phosphate) in 25 mM HEPES-KOH, pH 7.5, 20 mM KCl, 5 mM MgCl<sub>2</sub>, 10% glycerol,  
360 0.032% NP40, and 0.2 mM DTT and adding substrate to initiate the reactions. Samples of each  
361 reaction were taken at specific time points and stopped by addition of SDS-PAGE loading dye and  
362 boiling at 100 °C before loading on Tris-Glycine-SDS gels. Bands were visualized by staining with  
363 colloidal Coomassie G-250 and quantified by ImageQuant (GE Healthcare) after scanning by  
364 Typhoon FLA 9500 (GE Healthcare). The fraction (His)<sub>6</sub>-SUMO-σ<sup>AntA</sup> remaining was calculated by  
365 dividing the (His)<sub>6</sub>-SUMO-σ<sup>AntA</sup> density at a given time point by the density at time zero and  
366 normalized by ClpX density.

#### 367 **Data availability**

368 The next-generation sequencing data obtained in this study are available under  
369 ArrayExpress accessions E-MTAB-7700 and E-MTAB-5122.

#### 370 **Funding information**

371 B.B. was supported by a grant from the Biotechnology and Biological Sciences Research  
372 Council (BB/N007980/1) awarded to R.F.S. S.K. was supported by a National Science Foundation  
373 Graduate Research Fellowship and the Howard Hughes Medical Foundation; T.A.B is an employee  
374 of the Howard Hughes Medical Foundation.

#### 375 **Acknowledgements**

376 We are grateful for helpful discussions with Matt Hutchings, Paul Hoskisson, Kenneth  
377 McDowall and Alex O'Neill.

378 **References**

- 379 1. Zhu, H., Sandiford, S. K. & van Wezel, G. P. Triggers and cues that activate antibiotic  
380 production by actinomycetes. *J. Ind. Microbiol. Biotechnol.* **41**, 371–386 (2013).
- 381 2. Newman, D. J. & Cragg, G. M. Natural products as sources of new drugs over the 30 years  
382 from 1981 to 2010. *J. Nat. Prod.* **75**, 311–335 (2012).
- 383 3. van Wezel, G. P. & McDowall, K. J. The regulation of the secondary metabolism of  
384 *Streptomyces*: new links and experimental advances. *Nat. Prod. Rep.* **28**, 1311–23 (2011).
- 385 4. van der Heul, H. U., Bilyk, B. L., McDowall, K. J., Seipke, R. F. & van Wezel, G. P.  
386 Regulation of antibiotic production in Actinobacteria: new perspectives from the post-  
387 genomic era. *Nat. Prod. Rep.* **35**, 575–604 (2018).
- 388 5. Joynt, R. & Seipke, R. F. A phylogenetic and evolutionary analysis of antimycin  
389 biosynthesis. *Microbiology* **164**, 28–39 (2018).
- 390 6. Dunshee, B. R., Leben, C., Keitt, G. W. & Strong, F. M. The isolation and properties of  
391 antimycin A. *J. Am. Chem. Soc.* **71**, 2436–2437 (1949).
- 392 7. Tzung, S. P. *et al.* Antimycin A mimics a cell-death-inducing Bcl-2 homology domain 3.  
393 *Nat. Cell. Biol.* **3**, 183–191 (2001).
- 394 8. Seipke, R. F. *et al.* A Single *Streptomyces* symbiont makes multiple antifungals to support  
395 the fungus farming ant *Acromyrmex octospinosus*. *PLoS ONE* **6**, e22028–8 (2011).
- 396 9. Seipke, R. F., Patrick, E. & Hutchings, M. I. Regulation of antimycin biosynthesis by the  
397 orphan ECF RNA polymerase sigma factor  $\sigma^{\text{AntA}}$ . *PeerJ* **2**, e253 (2014).
- 398 10. McLean, T. C., Hoskisson, P. A. & Seipke, R. F. Coordinate regulation of antimycin and  
399 candicidin biosynthesis. *mSphere* **1**, e00305–16 (2016).
- 400 11. Helmann, J. D. The extracytoplasmic function (ECF) sigma factors. *Adv. Microb. Physiol.*  
401 **46**, 47–110 (2002).
- 402 12. Staroń, A. *et al.* The third pillar of bacterial signal transduction: classification of the  
403 extracytoplasmic function (ECF)  $\sigma$  factor protein family. *Mol. Microbiol.* **74**, 557–581  
404 (2009).
- 405 13. Paget, M. Bacterial Sigma Factors and Anti-Sigma Factors: Structure, Function and  
406 Distribution. *Biomolecules* **5**, 1245–1265 (2015).
- 407 14. Gur, E., Biran, D. & Ron, E. Z. Regulated proteolysis in Gram-negative bacteria—how and  
408 when? *Nat. Rev. Microbiol.* **9**, 839–848 (2011).
- 409 15. Baker, T. A. & Sauer, R. T. ClpXP, an ATP-powered unfolding and protein-degradation  
410 machine. *Biochim. Biophys. Acta.* **1823**, 15–28 (2012).
- 411 16. Olivares, A. O., Baker, T. A. & Sauer, R. T. Mechanistic insights into bacterial AAA+  
412 proteases and protein-remodelling machines. *Nat. Rev. Microbiol.* **14**, 33–44 (2015).
- 413 17. de Crécy-Lagard, V., Servant-Moisson, P., Viala, J., Grandvalet, C. & Mazodier, P.  
414 Alteration of the synthesis of the Clp ATP-dependent protease affects morphological and  
415 physiological differentiation in *Streptomyces*. *Mol. Microbiol.* **32**, 505–517 (1999).
- 416 18. Viala, J., Rapoport, G. & Mazodier, P. The *clpP* multigenic family in *Streptomyces lividans*:  
417 conditional expression of the *clpP3 clpP4* operon is controlled by PopR, a novel  
418 transcriptional activator. *Mol. Microbiol.* **38**, 602–612 (2000).
- 419 19. Viala, J. & Mazodier, P. ClpP-dependent degradation of PopR allows tightly regulated  
420 expression of the *clpP3 clpP4* operon in *Streptomyces lividans*. *Mol. Microbiol.* **44**, 633–643  
421 (2002).
- 422 20. Keiler, K. C., Waller, P. R. & Sauer, R. T. Role of a peptide tagging system in degradation of  
423 proteins synthesized from damaged messenger RNA. *Science* **271**, 990–993 (1996).
- 424 21. Gottesman, S., Roche, E., Zhou, Y. & Sauer, R. T. The ClpXP and ClpAP proteases degrade  
425 proteins with carboxy-terminal peptide tails added by the SsrA-tagging system. *Genes Dev.*  
426 **12**, 1338–1347 (1998).
- 427 22. Flynn, J. M. *et al.* Overlapping recognition determinants within the *ssrA* degradation tag  
428 allow modulation of proteolysis. *Proc. Natl. Acad. Sci. USA.* **98**, 10584–10589 (2001).

- 429 23. Seipke, R. F., Hutchings, M. I. & Hutchings, M. I. The regulation and biosynthesis of  
430 antimycins. *Beilstein J. Org. Chem.* **9**, 2556–2563 (2013).
- 431 24. Schoenian, I. *et al.* An unprecedented 1,2-shift in the biosynthesis of the 3-aminosalicylate  
432 moiety of antimycins. *ChemBioChem* **13**, 769–773 (2012).
- 433 25. Luo, Y., Zhang, L., Barton, K. W. & Zhao, H. Systematic Identification of a Panel of Strong  
434 Constitutive Promoters from *Streptomyces albus*. *ACS Synth. Biol.* **4**, 1001–1010 (2015).
- 435 26. Flynn, J. M., Neher, S. B., Kim, Y. I., Sauer, R. T. & Baker, T. A. Proteomic Discovery of  
436 Cellular Substrates of the ClpXP Protease Reveals Five Classes of ClpX-Recognition  
437 Signals. *Mol. Cell.* **11**, 671–683 (2003).
- 438 27. Foulston, L. C. & Bibb, M. J. Microbisporicin gene cluster reveals unusual features of  
439 lantibiotic biosynthesis in actinomycetes. *Proc. Natl. Acad. Sci. U.S.A.* **107**, 13461–13466  
440 (2010).
- 441 28. Sherwood, E. J. & Bibb, M. J. The antibiotic planosporicin coordinates its own production in  
442 the actinomycete *Planomonospora alba*. *Proc. Natl. Acad. Sci. U.S.A.* **110**, E2500–E2509  
443 (2013)
- 444 29. Hoskins, J. R., Yanagihara, K., Mizuuchi, K. & Wickner, S. ClpAP and ClpXP degrade  
445 proteins with tags located in the interior of the primary sequence. *Proc. Natl. Acad. Sci. USA.*  
446 **99**, 11037–11042 (2002).
- 447 30. Mika, F. & Hengge, R. A two-component phosphotransfer network involving ArcB, ArcA,  
448 and RssB coordinates synthesis and proteolysis of sigmaS (RpoS) in *E. coli*. *Genes Dev.* **19**,  
449 2770–2781 (2005).
- 450 31. Mao, X-M. *et al.* Dual positive feedback regulation of protein degradation of an extra-  
451 cytoplasmic function  $\sigma$  factor for cell differentiation in *Streptomyces coelicolor*. *J. Biol.*  
452 *Chem.* **288**, 31217–31228 (2013).
- 453 32. Ades, S. E., Connolly, L. E., Alba, B. M. & Gross, C. A. The *Escherichia coli* sigma(E)-  
454 dependent extracytoplasmic stress response is controlled by the regulated proteolysis of an  
455 anti-sigma factor. *Genes Dev.* **13**, 2449–2461 (1999).
- 456 33. Alba, B. M., Leeds, J. A., Onufryk, C., Lu, C. Z. & Gross, C. A. DegS and YaeL participate  
457 sequentially in the cleavage of RseA to activate the sigma(E)-dependent extracytoplasmic  
458 stress response. *Genes Dev.* **16**, 2156–2168 (2002).
- 459 34. Flynn, J. M., Levchenko, I., Sauer, R. T. & Baker, T. A. Modulating substrate choice: the  
460 SspB adaptor delivers a regulator of the extracytoplasmic-stress response to the AAA+  
461 protease ClpXP for degradation. *Genes Dev.* **18**, 2292–2301 (2004).
- 462 35. Zellmeier, S., Schumann, W. & Wiegert, T. Involvement of Clp protease activity in  
463 modulating the *Bacillus subtilis* sigma W stress response. *Mol. Microbiol.* **61**, 1569–1582  
464 (2006).
- 465 36. Bellier, A. & Mazodier, P. ClgR, a Novel Regulator of *clp* and *lon* expression in  
466 *Streptomyces*. *J. Bacteriol.* **186**, 3238–3248 (2004).
- 467 37. Bellier, A., Gominet, M. & Mazodier, P. Post-translational control of the *Streptomyces*  
468 *lividans* ClgR regulon by ClpP. *Microbiology* **152**, 1021–1027 (2006).
- 469 38. Mettert, E. L. & Kiley, P. J. ClpXP-dependent Proteolysis of FNR upon Loss of its O<sub>2</sub>-  
470 sensing [4Fe–4S] Cluster. *J. Mol. Biol.* **354**, 220–232 (2005).
- 471 39. Alkhalaf, L. M. & Ryan, K. S. Biosynthetic manipulation of tryptophan in bacteria: pathways  
472 and mechanisms. *Chem. Biol.* **22**, 317–328 (2015).
- 473 40. Palazzotto, E. *et al.* TrpM, a Small Protein Modulating Tryptophan Biosynthesis and  
474 Morpho-Physiological Differentiation in *Streptomyces coelicolor* A3(2). *PLoS ONE* **11**,  
475 e0163422–17 (2016).
- 476 41. Kieser, T., Bibb, M. J., Buttner, M. J., Chater, K. F. & Hopwood, D. A. Practical  
477 *Streptomyces* Genetics. John Innes Foundation (2000)
- 478 42. Seipke, R. F., Grünschow, S., Goss, R. J. M. & Hutchings, M. I. *Methods Enzymol.* **517**, 47–  
479 70 (2012).

- 480 43. Ramirez, F., Dundar, F., Diehl, S., Gruning, B. A. & Manke, T. deepTools: a flexible  
481 platform for exploring deep-sequencing data. *Nucleic Acids Res.* **42**, W187–W191 (2014).  
482 44. Fu, J. *et al.* Full-length RecE enhances linear-linear homologous recombination and  
483 facilitates direct cloning for bioprospecting. *Nat. Biotechnol.* **30**, 440–446 (2012).  
484 45. Myronovskyi, M. *et al.* Iterative marker excision system. *Appl. Microbiol. Biotechnol.* **98**,  
485 4557–4570 (2014).  
486 46. Wang, K. H., Sauer, R. T. & Baker, T. A. ClpS modulates but is not essential for bacterial N-  
487 end rule degradation. *Genes Dev.* **21**, 403–408.  
488 47. Neher, S. B., Sauer, R. T. & Baker, T. A. Distinct peptide signals in the UmuD and UmuD'  
489 subunits of UmuD/D' mediate tethering and substrate processing by the ClpXP protease.  
490 *Proc. Natl. Acad. Sci. USA.* **100**, 13219–13224 (2003).  
491 48. Kim, Y. I., Burton, R. E., Burton, B. M., Sauer, R. T. & Baker, T. A. Dynamics of substrate  
492 denaturation and translocation by the ClpXP degradation machine. *Mol. Cell* **5**, 639–648  
493 (2000).  
494 49. Seipke, R. F. *et al.* Draft genome sequence of *Streptomyces* strain S4, a symbiont of the leaf-  
495 cutting ant *Acromyrmex octospinosus*. *J. Bacteriol.* **193**, 4270–4271.
