1 **Direct proteolytic control of an extracytoplasmic function RNA polymerase sigma factor**

2 Bohdan Bilyk<sup>1</sup>, Sora Kim<sup>2</sup>, Tania A. Baker<sup>2,3</sup>, Ryan F. Seipke<sup>1\*</sup>

3

4 <sup>1</sup>Astbury Centre for Structural Molecular Biology, Faculty of Biological Sciences, University of

5 Leeds, Leeds, UK

6 <sup>2</sup>Department of Biology, Massachusetts Institute of Technology, Cambridge, MA, USA

7 <sup>3</sup>Howard Hughes Medical Institute, Chevy Chase, MD, USA

8

9 **\*Corresponding author:**

10 Ryan F. Seipke

11 E-mail: r.seipke@leeds.ac.uk

12

13 **Keywords:** *Streptomyces*; regulation of secondary metabolism; antimycin; ECF sigma factors;

14 **proteolysis; ClpXP**

## 15 **Abstract**

16           The survival of any microbe relies upon its ability to respond to environmental change. Use  
17 of Extra Cytoplasmic Function (ECF) RNA polymerase sigma ( $\sigma$ ) factors is a major strategy enabling  
18 such signal transduction. *Streptomyces* species harbour a large number of ECF  $\sigma$  factors; nearly all  
19 of which regulate genes required for morphological differentiation and/or response to environmental  
20 stress, except for  $\sigma^{\text{AntA}}$ , which regulates starter-unit biosynthesis in the production of antimycin, an  
21 anticancer compound. Unlike a canonical ECF  $\sigma$  factor, whose activity is regulated by a cognate anti-  
22  $\sigma$  factor,  $\sigma^{\text{AntA}}$  is an orphan, raising intriguing questions about how its activity may be controlled.  
23 Here, we reconstitute *in vitro* ClpXP proteolysis of  $\sigma^{\text{AntA}}$ , but not a variant lacking a C-terminal di-  
24 alanine motif. Furthermore, we show that the abundance of  $\sigma^{\text{AntA}}$  *in vivo* is enhanced by removal of  
25 the ClpXP recognition sequence, and that levels of the protein rise when cellular ClpP-protease  
26 activity is abolished. These data establish direct proteolysis as an alternative and thus far unique  
27 control strategy for an ECF RNA polymerase  $\sigma$  factor and expands the paradigmatic understanding  
28 of microbial signal transduction regulation.

29

## 30 **Importance**

31           Most antibiotics are derived from secondary metabolites produced by *Streptomyces* species.  
32 The recent rise in the number of bacterial infections resistant to antibiotics has led to renewed interest  
33 in discovery of new secondary metabolites produced by these microbes. An average species of  
34 *Streptomyces* harbours ~30 biosynthetic pathways, but the majority of them are not in the laboratory.  
35 A key approach is therefore activation of these “silent” pathways, but new insights into how their  
36 expression is regulated are required. Our findings reveal that the ECF  $\sigma$  factor ( $\sigma^{\text{AntA}}$ ) that regulates  
37 antimycin biosynthesis lacks an anti- $\sigma$  partner and instead is controlled by the Clp-protease system.  
38 These data establish direct proteolysis as a novel strategy for the control of ECF RNA polymerase  $\sigma$   
39 factors and will aid the pursue of silent biosynthetic pathways.

## 40 **Introduction**

41           The survival of any organism relies upon its ability to respond to environmental change. This  
42 feature is especially true of bacteria, which often live in hostile and fluctuating environments.  
43 *Streptomyces* bacteria thrive in soils. The success of this genus of filamentous, sporulating bacteria  
44 is linked to their complex lifecycle and keen ability to sense and respond to its surroundings. Notably,  
45 a multitude of bioactive secondary or specialised metabolites are produced in response to  
46 environmental cues<sup>1</sup>. More than half of all small molecule therapeutics critical for human health and  
47 wellbeing are derived from or inspired by *Streptomyces* natural products<sup>2</sup>.

48           *Streptomyces* species typically harbor a large number of biosynthetic pathways, but only a  
49 few of them are expressed under common laboratory conditions. The biochemical diversity encoded  
50 by these silent pathways is a tremendous untapped resource for discovery of new antibacterial agents  
51 and other therapeutics. All data available indicates that the production of natural products is  
52 controlled predominantly at the level of transcription. Although there are complex regulatory  
53 cascades that tightly control expression of biosynthetic genes, they are ultimately activated, repressed  
54 or de-repressed by so-called cluster-situated regulators—regulatory protein(s) encoded within the  
55 biosynthetic gene cluster (BGC)<sup>3,4</sup>. Major roadblocks preventing the exploitation of silent  
56 biosynthetic pathways are a lack of insight into their regulation and limited technology for activating  
57 their expression.

58           Antimycins have been known for 70 years and are the founding member of a large class of  
59 natural products widely produced by *Streptomyces* species<sup>5,6</sup>. Recently, antimycins were shown to be  
60 potent and selective inhibitors of the mitochondrial Bcl-2/Bcl-X<sub>L</sub>-related antiapoptotic proteins that  
61 are overproduced by cancer cells and confer resistance to chemotherapeutic agents whose mode of  
62 action is activation of apoptosis<sup>7</sup>. The ~25 kb antimycin (*ant*) BGC harboured by *S. albus* is composed  
63 of 15 genes organised into four polycistronic operons *antAB*, *antCDE*, *antFG* and *antHIJKLMNO*  
64 (Fig. 1)<sup>8,9</sup>. The regulation of this *ant* BGC is unusual compared to other secondary metabolites. Its  
65 expression is regulated by FscRI, a cluster-situated LuxR-family regulator of candicidin biosynthesis;

66 FscRI activates expression of *antAB* and *antCDE*<sup>10</sup>. Importantly, *antA* is a cluster-situated regulator  
 67 that encodes an Extra Cytoplasmic Function (ECF) RNA polymerase  $\sigma$  factor ( $\sigma^{\text{AntA}}$ ) that activates  
 68 expression of the remaining operons: *antGF* and *antHIJKLMNO* (Fig. 1)<sup>9</sup>.

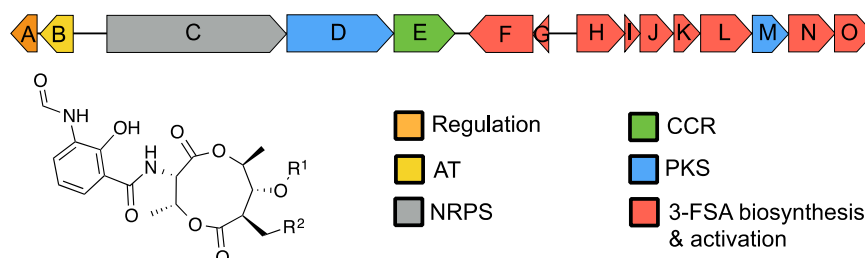

69

70 **Fig. 1** | Schematic representation of the antimycin (*ant*) biosynthetic gene cluster. AT,  
 71 acyltransferase; NRPS, non-ribosomal peptide synthetase; PKS, polyketide synthase; CCR, crotonyl-  
 72 CoA carboxylase/reductase, 3-FSA, 3-formamidosalicylate. Antimycins: Antimycin A<sub>1</sub>, R<sup>1</sup>=  
 73 COCH(CH<sub>3</sub>)CH<sub>2</sub>CH<sub>3</sub>, R<sup>2</sup>=(CH<sub>2</sub>)<sub>4</sub>CH<sub>3</sub>; Antimycin A<sub>2</sub>, R<sup>1</sup>=COCH(CH<sub>3</sub>)<sub>2</sub>, R<sup>2</sup>=(CH<sub>2</sub>)<sub>4</sub>CH<sub>3</sub>; Antimycin  
 74 A<sub>3</sub>, R<sup>1</sup>=COCH<sub>2</sub>CH(CH<sub>3</sub>)<sub>2</sub>, R<sup>2</sup>=(CH<sub>2</sub>)<sub>2</sub>CH<sub>3</sub>; Antimycin A<sub>4</sub>, R<sup>1</sup>=COCH(CH<sub>3</sub>)<sub>2</sub>, R<sup>2</sup>=(CH<sub>2</sub>)<sub>2</sub>CH<sub>3</sub>.  
 75

76

77  $\sigma^{\text{AntA}}$ , like all ECF  $\sigma$  factors, is similar to the housekeeping  $\sigma^{70}$  family, but only possesses two  
 78 of the four highly characteristic sigma domains: domains  $\sigma_2$  and  $\sigma_4$ ; these regions of sigma bind the  
 79 -10 and -35 promoter elements, respectively and are sufficient for recruitment of RNA polymerase<sup>11</sup>.  
 80 Genes encoding ECF  $\sigma$  factors are almost always co-transcribed with their cognate anti- $\sigma$  factor<sup>12</sup>.  
 81 This class of anti- $\sigma$  factors are transmembrane proteins that selectively bind to and inactivate a partner  
 82  $\sigma$  factor until its release is stimulated, usually by an exogenous signal<sup>12,13</sup>. After the  $\sigma$  factor is released  
 83 it recruits RNA polymerase to express a defined regulon that usually includes the  $\sigma$  factor-anti- $\sigma$   
 84 factor operon itself, which thus establishes a positive auto-feedback loop in the presence of the  
 85 inducing stimulus. *Streptomyces* species encode a large number of ECF  $\sigma$  factors (>30 per strain) and  
 86 nearly all of these regulate genes required for morphological differentiation and/or response to  
 87 environmental stress and, in contrast to  $\sigma^{\text{AntA}}$ , are not dedicated regulators of one biosynthetic  
 88 pathway<sup>9</sup>. In addition, unlike the canonical ECF  $\sigma$  factors, whose activities are controlled by cognate  
 89 anti- $\sigma$  factors,  $\sigma^{\text{AntA}}$  appears to be an “orphan”, lacking such a regulatory partner protein and thus has  
 90 created curiosity about how its activity is controlled.

91           The Clp-protease system is essential for normal bacterial proteostasis and is best characterised  
92 in *Escherichia coli*<sup>14,15</sup>. The Clp protease is a multi-enzyme complex composed of a barrel-shaped  
93 peptidase, ClpP and a regulatory enzyme, either ClpA or ClpX (or ClpC in some organisms). ClpA  
94 and ClpX (and ClpC) are all AAA+-family protein unfoldases that recognise an N- and/or C-terminal  
95 recognition signal (degron) and utilise ATP to unfold and translocate proteins to the peptidase  
96 chamber where they are degraded into short peptides<sup>16</sup>. In *Streptomyces* species, the peptidase is  
97 specified by two genes instead of one and is redundantly encoded<sup>17</sup>. The primary peptidase is encoded  
98 by *clpPIP2*, whose corresponding proteins form a complex with ClpX or ClpA to facilitate normal  
99 proteostasis; the second peptidase is encoded by *clpP3P4*, but its expression only occurs when the  
100 primary system is compromised<sup>18,19</sup>. The best understood degron is the SsrA tag from *E. coli*  
101 (AANDENYALAA), which is added co-translationally to polypeptides stalled on ribosomes<sup>20,21</sup>. The  
102 *E. coli* SsrA tag has been comprehensively studied and the C-terminal Ala-Ala-COO<sup>-</sup> of this motif is  
103 essential for proteolysis by ClpXP<sup>22</sup>. Intriguingly, the C-terminus of  $\sigma^{\text{AntA}}$  harbours the sequence Ala-  
104 Ala-COO<sup>-</sup>, which previously led us to speculate that ClpXP may modulate its level/activity<sup>9</sup>.

105           Here, we reconstitute ClpXP proteolysis of  $\sigma^{\text{AntA}}$  *in vitro* and show that it is dependent upon  
106 the C-terminal Ala-Ala. We also show that the abundance of  $\sigma^{\text{AntA}}$  *in vivo* is higher when Ala-Ala is  
107 changed to Asp-Asp and that abundance  $\sigma^{\text{AntA}}$  is elevated in the absence of genes encoding the  
108 primary peptidase, ClpP and its unfoldases, ClpA and ClpX. These data establish direct proteolysis  
109 as an alternative, and thus far unique, control strategy of ECF RNA polymerase  $\sigma$  factors, expanding  
110 the paradigmatic understanding of microbial signal transduction regulation.

## 111 Results

112  **$\sigma^{\text{AntA}}$  orthologues are a new subfamily of ECF  $\sigma$  factor that regulate production of the**  
113 **antimycin biosynthetic starter unit.** Since its initial discovery six years ago, more than 70 *ant* BGCs  
114 have been identified within actinomycete genera, including in *Actinobacteria*, *Actinospica*,  
115 *Saccharopolyspora*, *Streptacidiphilus* and *Streptomyces*<sup>5</sup>. Each of these BGCs harbours a single  
116 regulator,  $\sigma^{\text{AntA}}$  (53-100% shared amino acid identity across all orthologues), which lacks a cognate  
117 anti- $\sigma$  factor partner<sup>5,9</sup>. Our previous work with *S. albus* S4 established that  $\sigma^{\text{AntA}}$  orthologues  
118 comprise a new subfamily of ECF  $\sigma$  factors<sup>9,23</sup>. We demonstrated  $\sigma^{\text{AntA}}$  is required for expression of  
119 *antFG* and *antHIJKLMNO*, which encode a standalone ketoreductase (AntM) and proteins required  
120 for the production/activation of the starter unit, 3-formamidosalicylate (3-FSA) (Fig. 1). We also  
121 mapped the transcriptional start sites and identified conserved promoter sequences for these operons  
122 in all known antimycin BGCs at the time<sup>9</sup>. The conservation of  $\sigma^{\text{AntA}}$  and target promoters within *ant*  
123 BGCs from taxonomically diverse species, suggests that  $\sigma^{\text{AntA}}$ -mediated regulation of these genes is  
124 direct. To verify this hypothesis, we performed ChIP-seq with a *S. albus* S4  $\Delta antA$  mutant  
125 complemented with an N-terminal 3xFLAG-tagged version of  $\sigma^{\text{AntA}}$ . The number of reads that  
126 mapped to the promoters of *antGF* and *antHIJKLMNO* was enriched for both biological replicates of  
127  $\Delta antA/3x\text{FLAG-}antA$  compared to that of the wild-type mock-immunoprecipitated control, indicating  
128 that  $\sigma^{\text{AntA}}$  directly activates the production of the 3-FSA starter unit during antimycin biosynthesis  
129 (Fig. 2).

130

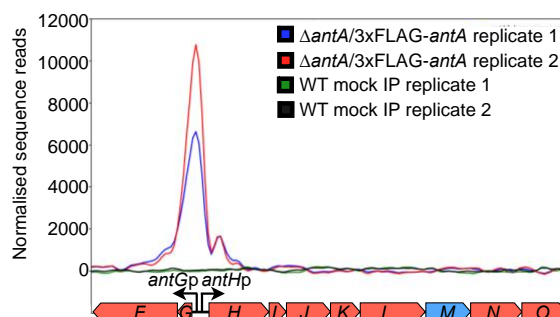

131 **Fig. 2 | 3xFLAG- $\sigma^{\text{AntA}}$  binds to the *antGF* and *antHIJKLMNO* promoters *in vivo*.** Shown is a  
132 graphical representation of normalised sequence reads mapped to the intergenic region of *antG-antH*  
133 (shown at bottom). The genomic coordinates depicted are nucleotides 43,148 to 51,448 of contig  
134 CADY01000091.1 of the *S. albus* S4 genome<sup>49</sup>. WT, wild-type; IP, immunoprecipitation.

135  
136  **$\sigma^{\text{AntA}}$  is degraded by the ClpXP protease *in vitro*.** The activity of almost all characterised  
137 ECF  $\sigma$  factors are modulated by a cognate anti- $\sigma$  factor, which is typically a small transmembrane  
138 protein co-encoded within the same operon, so the absence of an anti- $\sigma$  factor partner to control  $\sigma^{\text{AntA}}$   
139 is particularly intriguing, and makes  $\sigma^{\text{AntA}}$  be considered an orphan regulatory protein. An inspection  
140 of  $\sigma^{\text{AntA}}$  amino acid sequences revealed a C-terminal Ala-Ala in 67 out of the 71 orthologues  
141 (Supplementary Fig. 1). A C-terminal Ala-Ala is an important component of a common class of  
142 degrons for the ClpXP protease<sup>22</sup>. This observation led us to hypothesise that the activity of  $\sigma^{\text{AntA}}$   
143 could be modulated by proteolysis instead of by an anti- $\sigma$  factor. To test this hypothesis, we  
144 performed *in vitro* proteolysis. Previous work indicated that *S. albus* S4  $\sigma^{\text{AntA}}$  was insoluble when  
145 overproduced by *E. coli*, so we pursued the overproduction and purification of the orthologue from  
146 *Streptomyces ambofaciens* ATCC 23877, which is an experimentally demonstrated producer of  
147 antimycins<sup>24</sup>. *S. ambofaciens*  $\sigma^{\text{AntA}}$  (75% shared amino acid identity with *S. albus* S4  $\sigma^{\text{AntA}}$ ) was  
148 purified as an N-terminal (His)<sub>6</sub>-SUMO-fusion protein. The (His)<sub>6</sub>-SUMO tag increases solubility  
149 and eases purification of putative substrates, without altering recognition of C-terminal degrons by  
150 ClpXP. ClpX orthologues from *E. coli* and *S. ambofaciens* possess 60% shared amino acid identity  
151 and therefore likely recognise similar substrates for degradation. Thus, ClpXP from *E. coli* was  
152 purified and its ability to degrade (His)<sub>6</sub>-SUMO- $\sigma^{\text{AntA}}$  was assessed. Degradation of (His)<sub>6</sub>-SUMO-  
153  $\sigma^{\text{AntA}}$  was apparent as early as 2.5 min after addition of ATP and all of the sample was degraded by  
154 15 min (Fig. 3). Substrates of ClpXP become resistant to proteolysis by specific alterations of the C-  
155 terminal Ala-Ala<sup>22</sup>. Therefore, to investigate degradation specificity in the above experiment we  
156 constructed and tested a variant of *S. ambofaciens*  $\sigma^{\text{AntA}}$  in which the C-terminal Ala-Ala was mutated  
157 to Asp-Asp ((His)<sub>6</sub>-SUMO- $\sigma^{\text{AntA-DD}}$ ). Strikingly, the Asp-Asp variant was stable against ClpXP  
158 degradation over the lifetime of the assay (Fig. 3). Thus, the degradation of (His)<sub>6</sub>-SUMO- $\sigma^{\text{AntA}}$  and  
159 the characteristic resistance afforded by the Ala-Ala-to-Asp-Asp mutation demonstrates that  $\sigma^{\text{AntA}}$  is  
160 a direct substrate of ClpXP *in vitro*.

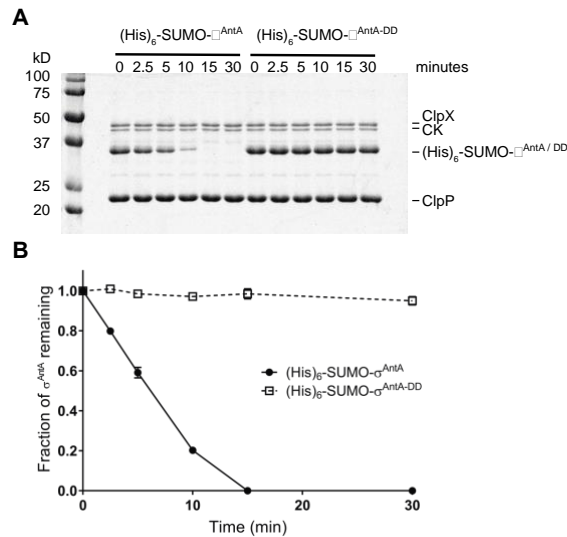

161

162 **Fig. 3 | Proteolysis of *S. ambifaciens*  $\sigma^{\text{AntA}}$  by ClpXP *in vitro*.** (A) SDS-PAGE analysis of  
163 proteolysis reactions containing 37 pmols (His)<sub>6</sub>SUMO- $\sigma^{\text{AntA}}$  or (His)<sub>6</sub>SUMO- $\sigma^{\text{AntA-DD}}$ . (B)  
164 Densitometry analysis SDS-PAGE images for three independent proteolysis experiments. The mean  
165 is plotted and error bars illustrate the standard error of the mean ( $\pm 1$  SEM).  
166

167  **$\sigma^{\text{AntA}}$  is degraded by ClpXP protease *in vivo*.** To investigate if the *in vitro* degradation  $\sigma^{\text{AntA}}$   
168 demonstrated above is relevant to its regulation *in vivo* we adopted a genetic strategy to assess the  
169 abundance of  $\sigma^{\text{AntA}}$  in mutant strains with defects in Clp-proteolysis. First, we deleted the *clpX*, *clpP1*,  
170 and *clpP2* genes from *S. albus* S4. The resulting mutant underwent a normal developmental cycle,  
171 albeit sporulation was less robust on ISP2 and MS medium (Supplemental Fig. 3). Next genes  
172 encoding the 3xFLAG- $\sigma^{\text{AntA}}$  or 3xFLAG- $\sigma^{\text{AntA-DD}}$  fusion proteins were generated and introduced into  
173 the parental strain and the  $\Delta clpXclpP1clpP2$  mutant so the abundance of these proteins could be  
174 assessed over a developmental time course by Western blotting with anti-FLAG antisera. This  
175 experiment was initially performed with the  $\sigma^{\text{AntA}}$  fusions integrated on the chromosome under  
176 control of the native protein. However, a reliable signal could not be detected for 3xFLAG- $\sigma^{\text{AntA}}$  and  
177 only a trace amount of the Asp-Asp variant was observed, presumably indicating that the cellular  
178 level of  $\sigma^{\text{AntA}}$  is normally low because the native promoter is relatively weak. The experiment was  
179 therefore repeated with 3xFLAG- $\sigma^{\text{AntA}}$  and 3xFLAG- $\sigma^{\text{AntA-DD}}$  expression driven by a stronger,  
180 constitutive promoter, *ermE*\*<sup>25</sup>. Analysis of the resulting immunoblot revealed that 3xFLAG- $\sigma^{\text{AntA-DD}}$   
181 <sup>DD</sup> was more abundant than 3xFLAG- $\sigma^{\text{AntA}}$  in extracts prepared from vegetative mycelia (14h and



182 17h) of the parent and  $\Delta clpXclpP1clpP2$  strains (Fig. 4). Strikingly, 3xFLAG- $\sigma^{\text{AntA}}$  and 3xFLAG-  
183  $\sigma^{\text{AntA-DD}}$  could only be detected in extracts from aerial mycelia (24h and 30h) of the  $\Delta clpXclpP1clpP2$   
184 strain and not the parent; the Asp-Asp variant was also present in greater relative abundance (Fig. 4).  
185 These data support the hypothesis that  $\sigma^{\text{AntA}}$  levels, and thus its ability to activate gene expression is  
186 modulated by the ClpXP protease, however the conspicuous absence of 3xFLAG- $\sigma^{\text{AntA}}$  and the  
187 presence 3xFLAG- $\sigma^{\text{AntA-DD}}$  in protein extracts prepared from the latest time point suggests the  
188 involvement of degradative factor(s) in addition to ClpXP.

189  **$\sigma^{\text{AntA}}$  is degraded by ClpAP protease *in vivo*.** Taken together, the data presented above  
190 establishes that ClpXP likely acts degrades  $\sigma^{\text{AntA}}$  *in vivo*, but also suggested the existence of other  
191 factor(s) that affect  $\sigma^{\text{AntA}}$  levels, especially later in the morphological development cycle. ClpA is an  
192 alternative targeting protein that forms a proteolytic complex with ClpP capable of degrading SsrA-  
193 tagged proteins<sup>21</sup>. Indeed, an overlap in proteins comprising the ClpAP and ClpXP degradomes has  
194 been observed for *E. coli*<sup>26</sup>. Thus, we hypothesised that ClpAP may also be able to degrade  $\sigma^{\text{AntA}}$ . We  
195 therefore generated a  $\Delta clpXclpP1clpP2clpA$  mutant and re-assessed the abundance of the 3xFLAG-  
196  $\sigma^{\text{AntA}}$  and 3xFLAG- $\sigma^{\text{AntA-DD}}$  by immunoblotting as above. Analysis of the resulting immunoblot  
197 revealed that 3xFLAG- $\sigma^{\text{AntA}}$  and 3xFLAG- $\sigma^{\text{AntA-DD}}$  were present in equal relative abundance within  
198  $\Delta clpXclpP1clpP2$  and  $\Delta clpXclpP1clpP2clpA$  lysate prepared after 14, 17 and 24hrs of growth (Fig.  
199 4). Strikingly, 3xFLAG- $\sigma^{\text{AntA}}$  was observed in lysate prepared after 30hrs of incubation only for the  
200  $\Delta clpXclpP1clpP2clpA$  strain. Taken together, these *in vivo* data indicate that  $\sigma^{\text{AntA}}$  is degraded by both  
201 the ClpXP and ClpAP proteases.

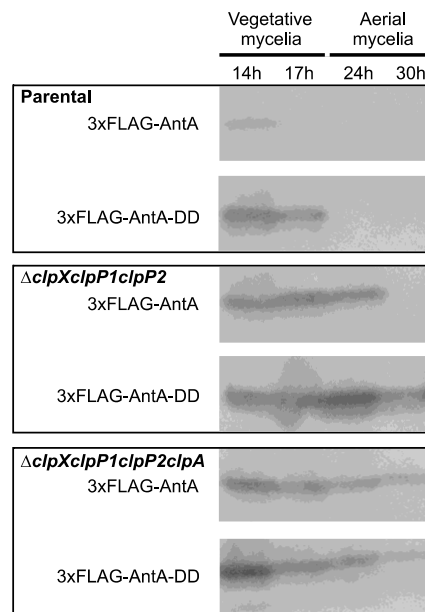

202

203

204

205

206

207

208

**Fig. 4 | The abundance of  $\sigma^{\text{AntA}}$  is enhanced in the absence of the Clp protease *in vivo*.** Cells from the indicated strains were cultivated over a developmental time course on agar media. Protein extracts were generated from 100mg of either vegetative mycelia (14 and 17 hours) or aerial mycelia (24 and 30hours) was harvested and lysed. Thirty micrograms of total protein were analysed by Western blotting with anti-FLAG antisera. The images shown are derived from uncropped original images shown in Supplementary Fig. 4.

## 209 Discussion

210 ECF  $\sigma$  factors are a major component of bacterial signal transduction, are typically involved  
211 in responding to external stimuli and their activity is canonically understood to be controlled via a  
212 cognate anti- $\sigma$  factor protein; the anti- $\sigma$  is usually membrane bound and almost always encoded at  
213 the same locus<sup>12</sup>. In this study, we characterised *in vitro* and *in vivo*, an ECF  $\sigma$  factor named  $\sigma^{\text{AntA}}$   
214 that does not possess any identifiable anti- $\sigma$  factor partner and as a consequence has evolved a  
215 different mechanism of regulation.

216 We established that  $\sigma^{\text{AntA}}$  is a cluster-situated regulator of antimycin biosynthesis and showed  
217 by ChIP-sequencing that it directly binds upstream of genes required for 3-FSA production. Although  
218 abundant within *Streptomyces* species, the activity of ECF  $\sigma$  factors that have been characterised are  
219 involved in responding to environmental stress and/or regulating morphological differentiation. To  
220 our knowledge,  $\sigma^{\text{AntA}}$  is the only ECF  $\sigma$  factor that is a cluster-situated regulator in the genus  
221 *Streptomyces*. Indeed, cluster-situated ECF  $\sigma$  factors have only thus far been observed within BGCs  
222 for lantibiotics produced by so-called rare actinomycetes and these are controlled by anti- $\sigma$  factors.  
223 In *Microbospora corallina*, MibR and  $\sigma^{\text{MibX}}$  regulate microbisporicin biosynthesis and  $\sigma^{\text{MibX}}$  is  
224 controlled by the anti- $\sigma$  factor, MibW<sup>27</sup>; in *Planomonospora alba*, PspR and  $\sigma^{\text{PspX}}$  regulate  
225 planosporicin production and  $\sigma^{\text{PspX}}$  is controlled by the anti- $\sigma$  factor, PspW<sup>28</sup>.

226 The C-terminal Ala-Ala present within  $\sigma^{\text{AntA}}$  orthologues served as a clue that instead of an  
227 anti- $\sigma$  factor that ClpXP may regulate  $\sigma^{\text{AntA}}$  activity. We unambiguously demonstrated that ClpXP  
228 degraded  $\sigma^{\text{AntA}}$  *in vitro*, but not an altered  $\sigma^{\text{AntA}}$  variant in which Ala-Ala was changed to Asp-Asp.  
229 We also assessed the level of  $\sigma^{\text{AntA}}$  *in vivo* and showed that it was more abundant within vegetative  
230 mycelia than in aerial mycelia and was partially stabilised by the Asp-Asp mutation, which was  
231 consistent with our previous experiments that showed the *ant* BGC is downregulated at the level of  
232 transcription upon the onset of aerial growth<sup>9</sup>. We demonstrated that the abundance of  $\sigma^{\text{AntA}}$  and the  
233 Asp-Asp variant was higher *in vivo* in a  $\Delta clpXclpP1clpP2$  mutant strain and further so when *clpA*  
234 (orthologous to SCO7532 (*clpC2*)) was deleted. It was surprising that the Asp-Asp mutation did not

235 fully protect  $\sigma^{\text{AntA}}$  from proteolysis *in vivo*, however enhanced abundance of  $\sigma^{\text{AntA-DD}}$  in  
236  $\Delta clpXclpP1clpP2$  and  $\Delta clpXclpP1clpP2clpA$  genetic backgrounds relative to the parent strain is  
237 consistent with previous studies indicating N-terminal and internal motifs can also be important for  
238 substrate recognition by Clp-proteases<sup>26,29</sup>. However, involvement of another protease, such as Lon,  
239 in the degradation  $\sigma^{\text{AntA}}$  cannot be excluded.

240 Direct ClpXP or ClpAP proteolysis of an ECF  $\sigma$  factor, as shown here, has not been reported  
241 previously. However, it has been linked to ECF  $\sigma$  factors in the past, where proteolysis of  $\sigma^{\text{S}}$  in *E.*  
242 *coli* and  $\sigma^{\text{T}}$  in *S. coelicolor* occurs via their association with an adapter protein or peptide,  
243 respectively<sup>30,31</sup>. In addition, ClpXP proteolysis of the anti- $\sigma$  factors RseA and RsiW enables  
244 expression the  $\sigma^{\text{E}}$  and  $\sigma^{\text{W}}$  regulons in *E. coli* and *Bacillus subtilis*, respectively<sup>32-35</sup>. ClpXP has also  
245 been linked to the turnover of other transcription factor families. For instance, the  $\lambda$  repressor-like  
246 proteins (InterPro ID=IPR010982) PopR and its paralogue ClgR, which participate in a feedback loop  
247 regulating expression of the *clp* genes in *S. lividans*<sup>36,37</sup>, and the global oxygen-sensing regulator,  
248 FNR in *E. coli*<sup>38</sup>.

249 Expression of the *ant* BGC is atypical compared to other BGCs in that it is expressed during  
250 vegetative growth, but downregulated upon the onset of aerial growth. Its expression is cross-  
251 activated by FscRI, a LuxR-family regulator, from the candicidin BGC, which activates expression  
252 of *antBA* and *antCDE*<sup>10</sup>. This regulation in turn enables direct activation of the 3-FSA biosynthetic  
253 operons (*antGF* and *antHIJKLMNO*) by  $\sigma^{\text{AntA}}$ . The cellular level of  $\sigma^{\text{AntA}}$  is antagonised by the Clp-  
254 protease system, for which it is a direct target and is ultimately responsible for clearing residual  $\sigma^{\text{AntA}}$   
255 when FscRI is inactivated following the onset of morphological differentiation<sup>10</sup>. The above model  
256 (Supplementary Fig. 5) is intriguing and begs the question why is it important for  $\sigma^{\text{AntA}}$  to be actively  
257 cleared from cell? One possibility is that aberrant/excess production of 3-FSA is cytotoxic, however  
258 previous experiments in which the *antA* gene was artificially overexpressed did not adversely impact  
259 growth of the organism<sup>9</sup>. An alternative hypothesis for why  $\sigma^{\text{AntA}}$  must be rapidly removed from the  
260 cell is to prevent unnecessary consumption of L-Trp. Biosynthesis of L-Trp is biologically expensive

261 and it is the most chemically complex and least abundant of the 20 common proteinogenic amino  
262 acids<sup>39</sup>. It is tempting to speculate that the evolutionary rationale underpinning this regulatory strategy  
263 is owed to the cell needing to dedicate more of this amino acid to production of proteins or metabolites  
264 involved in development. This is consistent with recent data showing that deletion of *trpM*, which  
265 controls precursor availability for L-Trp biosynthesis in *S. coelicolor* and presumably all  
266 streptomycetes, fails to undergo normal morphological development<sup>40</sup>.

267         In conclusion, here we establish direct proteolysis by the Clp-protease system as an alternative  
268 control strategy for ECF  $\sigma$  factors, which provides a new lens through which to examine microbial  
269 signal transduction and the regulation of natural product biosynthesis in *Streptomyces* species.  
270 Understanding the diversity of regulatory strategies controlling the expression of these pathways is  
271 critical for the development of new tools for exploiting the ‘silent majority’ of biosynthetic pathways  
272 harboured by these organisms.

## 273 **Materials and methods**

274 **Growth media, strains, cosmids, plasmids, and other reagents.** *Escherichia coli* strains  
275 were propagated on Lennox agar (LA) or broth (LB)<sup>41,42</sup> and *Streptomyces albus* S4 strains were  
276 cultivated using LA, LB, and mannitol-soya flour (MS) agar or broth<sup>41</sup>. Development of *clp* mutants  
277 was assessed on MS and ISP2 medium<sup>41</sup>. Culture medium was supplemented with antibiotics as  
278 required at the following concentrations: apramycin, 50 µg/ml; carbenicillin, 100 µg/ml;  
279 chloramphenicol, 25 µg/ml; hygromycin, 50 µg/ml; kanamycin, 50 µg/ml; nalidixic acid, 25 µg/ml.  
280 *Streptomyces* strains were constructed by conjugal mating with *E. coli* ET12567 as previously  
281 described<sup>41</sup>. Enzymes were purchased from New England BioLabs unless otherwise stated, and  
282 oligonucleotides were purchased from Integrated DNA Technologies, Inc. All of the strains, cosmids,  
283 and plasmids used in this study are described in Supplementary Table 1, and all of the  
284 oligonucleotides used are provided in Supplementary Table 2.

285 **Construction of plasmids.** The insert for each plasmid generated in this study was prepared  
286 by PCR amplification with Q5 High-Fidelity DNA polymerase and oligonucleotides containing  
287 restriction sites. PCR-amplified inserts were restricted and cloned into the relevant plasmids cut with  
288 the same enzymes by standard molecular biology procedures. All clones were sequenced to verify  
289 the integrity of insert DNA. The restriction sites used for cloning are provided with the plasmid  
290 descriptions in Supplementary Table 1.

291 **ChIP-seq and bioinformatics analyses.** The *antA* coding sequence was amplified  
292 with RFS629 and RFS630, which contain KpnI and EcoRI restriction sites, respectively. The  
293 restricted PCR product was cloned into pSETNFLAG digested with the same enzymes. The resulting  
294 plasmid was then restricted with NotI and EcoRI to release *ermE*\*p-3xFLAG-*antA*, which was  
295 subsequently cloned into pAU3-45 digested with the same enzymes. pAU3-45-3xFLAG-*antA* was  
296 mobilised to an apramycin-marked  $\Delta antA$  strain<sup>9</sup>. Cultivation of the wild-type and  
297  $\Delta antA$ /pAUNFLAG-*antA* strains for ChIP-seq were performed exactly as described  
298 previously<sup>10</sup>. The pure DNA resulting from immunoprecipitates from two biological replicates of

299 wild-type and  $\Delta antA$ /pAUNFLAG-*antA*, as well non-immunoprecipitated chromosomal DNA, were  
300 sequenced with the Illumina HiSeq3000 platform with 150-nucleotide paired-end reads by the  
301 University of Leeds Next Generation Sequencing Facility at the St. James Teaching Hospital NHS  
302 Trust. The resulting reads were analysed exactly as described previously<sup>10</sup>. The graphic in Figure 2  
303 was generated using DeepTools computeMatrix and plotProfile functions<sup>43</sup>.

304 **Construction of *S. albus* S4 *clp* mutant strains.** All deletions were performed by  
305 mutagenising cosmids using RecET recombineering in *E. coli* followed by their subsequent  
306 mobilisation to *S. albus* strains via conjugal transfer. The *clpXclpP1clpP2*-containing cosmid, cos117  
307 and *clpA*-containing cosmid, cos251 were obtained by screening a previously constructed *S. albus* S4  
308 Supercos1 cosmid library<sup>8</sup> by PCR using oligonucleotides PBB001 and PBB002 (*clpX*) and PBB067  
309 and PBB068 (*clpA*). Cos117 and cos251 were mutagenised as required using *E. coli* recombineering  
310 with strain GB05-red<sup>44</sup> and a deletion cassette. Deletion cassettes were generated by PCR from paa-  
311 apr-oriT<sup>45</sup> and consisted of the apramycin resistance gene, *aac(3)IV* and a conjugal origin of transfer  
312 (*oriT*), which was flanked by  $\Phi$ C31-*attL* and -*attR* sites for excision of the cassette. Oligonucleotides  
313 used to generate deletion cassettes included 39 nt of homology upstream or downstream of the target  
314 open reading frame(s) and are listed in Supplementary Table 2. The resulting PCR products were  
315 digested with DpnI, gel purified and electroporated into arabinose-induced *E. coli* GB05-red  
316 harbouring cos117 or cos251. Transformants were screened for the presence of mutagenised cosmid  
317 by PCR using oligonucleotides listed in Supplementary Table 2 and the integrity of the locus was  
318 verified by DNA sequencing. Mutagenised cosmids were electroporated into *E. coli*  
319 ET12567/pUZ8002 and mobilised to a strain of *S. albus* S4 harbouring an entire antimycin BGC  
320 deletion ( $\Delta antA$ ) by conjugation as described<sup>41</sup>. Transconjugants were screened for apramycin  
321 resistance and kanamycin sensitivity. The integrity of apramycin-marked mutants was verified by  
322 PCR using the oligonucleotides listed in Supplementary Table 2. The apramycin deletion cassette  
323 was subsequently excised from the chromosome by conjugal introduction of pUWLint31, which is a  
324 replicative plasmid with a temperature sensitive origin of replication that expresses the  $\Phi$ C31

325 integrase required for removal of the cassette<sup>45</sup>. Transconjugants were screened for loss of apramycin  
326 resistance and excision of the cassette was verified by polymorphic shift PCR and DNA sequencing  
327 of the product.

328 **Immunoblot analysis.** Spores of parental strain, *S. albus*  $\Delta$ antall,  $\Delta$ clpXclpP1clpP2 and  
329  $\Delta$ clpXclpP1clpP2clpA mutants carrying pPDA or pPDD were grown on SFM agar (buffered with  
330 50mM TES, pH 7.2) covered with cellophane discs. Protein extracts were prepared from mycelia  
331 collected at regular intervals during growth (14h, 17h, 24h and 30h) as follows: 100 mg of cells were  
332 resuspended in 200  $\mu$ l lysis buffer (50 mM sodium phosphate buffer, pH 7.0, 150 mM sodium  
333 chloride, 10 mg/ml lysozyme, cOmplete, Mini, EDTA-free protease inhibitors (Roche) and 100 mg  
334 of 0.1 mm glass beads (PowerLyzer®)) and lysed by vortexing for 30 min at 2000 rpm, 37°C, with a  
335 subsequent incubation for another 30 min at 37°C. The obtained suspension was centrifuged for 20  
336 min at 20,000g at 18°C. Thirty micrograms of the clarified protein extract were subjected to SDS-  
337 PAGE and then transferred to nitrocellulose membrane (pore size 0.2  $\mu$ m) for Western blot analysis.  
338 The membrane was probed with mouse monoclonal ANTI-FLAG® M2-Peroxidase (HRP) antibody  
339 (Sigma), 1:10 000, and the signals were detected using Pierce™ 1-Step Ultra TMB Blotting Solution  
340 (Thermo Scientific).

341 **Protein purification and *in vitro* ClpXP proteolysis assays.** The wild-type *antA* gene was  
342 PCR amplified and cloned into the AgeI and HindIII sites of the pET23b-SUMO vector, which  
343 harbours an N-terminal (His)<sub>6</sub>-SUMO tag<sup>46</sup>. The plasmid for production of (His)<sub>6</sub>-SUMO- $\sigma^{\text{AntA-DD}}$   
344 was generated by site-directed mutagenesis (Agilent QuikChange) using primers listed in  
345 Supplementary Table 2. (His)<sub>6</sub>-SUMO- $\sigma^{\text{AntA}}$  and (His)<sub>6</sub>-SUMO- $\sigma^{\text{AntA-DD}}$  were produced by *E. coli*  
346 Rosetta(DE3) (Novagen) grown in LB at 37 °C until OD<sub>600</sub> 0.5, followed by induction with 0.4 mM  
347 IPTG and growth at 18 °C for 16 hours. Cells were resuspended in 50 mM sodium phosphate, pH 8,  
348 1M NaCl, 20 mM imidazole, 10% glycerol, and 1 mM DTT and lysed by french press at 28 kpsi,  
349 followed by treatment with protease inhibitor cocktail set III, EDTA-free (Calbiochem) and  
350 benzonase (Millipore Sigma). (His)<sub>6</sub>-SUMO- $\sigma^{\text{AntA}}$  and (His)<sub>6</sub>-SUMO- $\sigma^{\text{AntA-DD}}$  proteins were purified



351 by Ni-NTA affinity chromatography and Superdex-75 gel filtration and stored in 50 mM potassium  
352 phosphate, pH 6.8, 850 mM KCl, 10% glycerol, and 1 mM DTT. *E. coli* ClpX and ClpP proteins  
353 were purified as described previously<sup>46,47</sup>.

354 *In vitro* ClpXP proteolysis assays were performed at 30 °C by preincubating 0.3 μM ClpX<sub>6</sub>  
355 and 0.8 μM ClpP<sub>14</sub> with ATP regeneration system (4 mM ATP, 50 μg/mL creatine kinase, 5 mM  
356 creatine phosphate) in 25 mM HEPES-KOH, pH 7.5, 20 mM KCl, 5 mM MgCl<sub>2</sub>, 10% glycerol,  
357 0.032% NP40, and 0.2 mM DTT and adding substrate to initiate the reactions. Samples of each  
358 reaction were taken at specific time points and stopped by addition of SDS-PAGE loading dye and  
359 boiling at 100 °C before loading on Tris-Glycine-SDS gels. Bands were visualized by staining with  
360 colloidal Coomassie G-250 and quantified by ImageQuant (GE Healthcare) after scanning by  
361 Typhoon FLA 9500 (GE Healthcare). The fraction (His)<sub>6</sub>-SUMO-σ<sup>AntA</sup> remaining was calculated by  
362 dividing the (His)<sub>6</sub>-SUMO-σ<sup>AntA</sup> density at a given time point by the density at time zero and  
363 normalized by ClpX density.

#### 364 **Data availability**

365 The next-generation sequencing data obtained in this study are available under  
366 ArrayExpress accessions E-MTAB-7700 and E-MTAB-5122.

#### 367 **Funding information**

368 B.B. was supported by a grant from the Biotechnology and Biological Sciences Research  
369 Council (BB/N007980/1) awarded to R.F.S. S.K. was supported by a National Science Foundation  
370 Graduate Research Fellowship and the Howard Hughes Medical Foundation; T.A.B is an employee  
371 of the Howard Hughes Medical Foundation.

#### 372 **Acknowledgements**

373 We are grateful for helpful discussions with Matt Hutchings, Paul Hoskisson, Kenneth  
374 McDowall and Alex O'Neill.

375 **References**

- 376 1. Zhu, H., Sandiford, S. K. & van Wezel, G. P. Triggers and cues that activate antibiotic  
377 production by actinomycetes. *J. Ind. Microbiol. Biotechnol.* **41**, 371–386 (2013).
- 378 2. Newman, D. J. & Cragg, G. M. Natural products as sources of new drugs over the 30 years  
379 from 1981 to 2010. *J. Nat. Prod.* **75**, 311–335 (2012).
- 380 3. van Wezel, G. P. & McDowall, K. J. The regulation of the secondary metabolism of  
381 *Streptomyces*: new links and experimental advances. *Nat. Prod. Rep.* **28**, 1311–23 (2011).
- 382 4. van der Heul, H. U., Bilyk, B. L., McDowall, K. J., Seipke, R. F. & van Wezel, G. P.  
383 Regulation of antibiotic production in Actinobacteria: new perspectives from the post-  
384 genomic era. *Nat. Prod. Rep.* **35**, 575–604 (2018).
- 385 5. Joynt, R. & Seipke, R. F. A phylogenetic and evolutionary analysis of antimycin  
386 biosynthesis. *Microbiology* **164**, 28–39 (2018).
- 387 6. Dunshee, B. R., Leben, C., Keitt, G. W. & Strong, F. M. The isolation and properties of  
388 antimycin A. *J. Am. Chem. Soc.* **71**, 2436–2437 (1949).
- 389 7. Tzung, S. P. *et al.* Antimycin A mimics a cell-death-inducing Bcl-2 homology domain 3.  
390 *Nat. Cell. Biol.* **3**, 183–191 (2001).
- 391 8. Seipke, R. F. *et al.* A Single *Streptomyces* symbiont makes multiple antifungals to support  
392 the fungus farming ant *Acromyrmex octospinosus*. *PLoS ONE* **6**, e22028–8 (2011).
- 393 9. Seipke, R. F., Patrick, E. & Hutchings, M. I. Regulation of antimycin biosynthesis by the  
394 orphan ECF RNA polymerase sigma factor  $\sigma^{\text{AntA}}$ . *PeerJ* **2**, e253 (2014).
- 395 10. McLean, T. C., Hoskisson, P. A. & Seipke, R. F. Coordinate regulation of antimycin and  
396 candicidin biosynthesis. *mSphere* **1**, e00305–16 (2016).
- 397 11. Helmann, J. D. The extracytoplasmic function (ECF) sigma factors. *Adv. Microb. Physiol.*  
398 **46**, 47–110 (2002).
- 399 12. Staroń, A. *et al.* The third pillar of bacterial signal transduction: classification of the  
400 extracytoplasmic function (ECF)  $\sigma$  factor protein family. *Mol. Microbiol.* **74**, 557–581  
401 (2009).
- 402 13. Paget, M. Bacterial Sigma Factors and Anti-Sigma Factors: Structure, Function and  
403 Distribution. *Biomolecules* **5**, 1245–1265 (2015).
- 404 14. Gur, E., Biran, D. & Ron, E. Z. Regulated proteolysis in Gram-negative bacteria—how and  
405 when? *Nat. Rev. Microbiol.* **9**, 839–848 (2011).
- 406 15. Baker, T. A. & Sauer, R. T. ClpXP, an ATP-powered unfolding and protein-degradation  
407 machine. *Biochim. Biophys. Acta.* **1823**, 15–28 (2012).
- 408 16. Olivares, A. O., Baker, T. A. & Sauer, R. T. Mechanistic insights into bacterial AAA+  
409 proteases and protein-remodelling machines. *Nat. Rev. Microbiol.* **14**, 33–44 (2015).
- 410 17. de Crécy-Lagard, V., Servant-Moisson, P., Viala, J., Grandvalet, C. & Mazodier, P.  
411 Alteration of the synthesis of the Clp ATP-dependent protease affects morphological and  
412 physiological differentiation in *Streptomyces*. *Mol. Microbiol.* **32**, 505–517 (1999).
- 413 18. Viala, J., Rapoport, G. & Mazodier, P. The *clpP* multigenic family in *Streptomyces lividans*:  
414 conditional expression of the *clpP3 clpP4* operon is controlled by PopR, a novel  
415 transcriptional activator. *Mol. Microbiol.* **38**, 602–612 (2000).
- 416 19. Viala, J. & Mazodier, P. ClpP-dependent degradation of PopR allows tightly regulated  
417 expression of the *clpP3 clpP4* operon in *Streptomyces lividans*. *Mol. Microbiol.* **44**, 633–643  
418 (2002).
- 419 20. Keiler, K. C., Waller, P. R. & Sauer, R. T. Role of a peptide tagging system in degradation of  
420 proteins synthesized from damaged messenger RNA. *Science* **271**, 990–993 (1996).
- 421 21. Gottesman, S., Roche, E., Zhou, Y. & Sauer, R. T. The ClpXP and ClpAP proteases degrade  
422 proteins with carboxy-terminal peptide tails added by the SsrA-tagging system. *Genes Dev.*  
423 **12**, 1338–1347 (1998).
- 424 22. Flynn, J. M. *et al.* Overlapping recognition determinants within the *ssrA* degradation tag  
425 allow modulation of proteolysis. *Proc. Natl. Acad. Sci. USA.* **98**, 10584–10589 (2001).

- 426 23. Seipke, R. F., Hutchings, M. I. & Hutchings, M. I. The regulation and biosynthesis of  
427 antimycins. *Beilstein J. Org. Chem.* **9**, 2556–2563 (2013).
- 428 24. Schoenian, I. *et al.* An unprecedented 1,2-shift in the biosynthesis of the 3-aminosalicylate  
429 moiety of antimycins. *ChemBioChem* **13**, 769–773 (2012).
- 430 25. Luo, Y., Zhang, L., Barton, K. W. & Zhao, H. Systematic Identification of a Panel of Strong  
431 Constitutive Promoters from *Streptomyces albus*. *ACS Synth. Biol.* **4**, 1001–1010 (2015).
- 432 26. Flynn, J. M., Neher, S. B., Kim, Y. I., Sauer, R. T. & Baker, T. A. Proteomic Discovery of  
433 Cellular Substrates of the ClpXP Protease Reveals Five Classes of ClpX-Recognition  
434 Signals. *Mol. Cell.* **11**, 671–683 (2003).
- 435 27. Foulston, L. C. & Bibb, M. J. Microbisporicin gene cluster reveals unusual features of  
436 lantibiotic biosynthesis in actinomycetes. *Proc. Natl. Acad. Sci. U.S.A.* **107**, 13461–13466  
437 (2010).
- 438 28. Sherwood, E. J. & Bibb, M. J. The antibiotic planosporicin coordinates its own production in  
439 the actinomycete *Planomonospora alba*. *Proc. Natl. Acad. Sci. U.S.A.* **110**, E2500–E2509  
440 (2013)
- 441 29. Hoskins, J. R., Yanagihara, K., Mizuuchi, K. & Wickner, S. ClpAP and ClpXP degrade  
442 proteins with tags located in the interior of the primary sequence. *Proc. Natl. Acad. Sci. USA.*  
443 **99**, 11037–11042 (2002).
- 444 30. Mika, F. & Hengge, R. A two-component phosphotransfer network involving ArcB, ArcA,  
445 and RssB coordinates synthesis and proteolysis of sigmaS (RpoS) in *E. coli*. *Genes Dev.* **19**,  
446 2770–2781 (2005).
- 447 31. Mao, X-M. *et al.* Dual positive feedback regulation of protein degradation of an extra-  
448 cytoplasmic function  $\sigma$  factor for cell differentiation in *Streptomyces coelicolor*. *J. Biol.*  
449 *Chem.* **288**, 31217–31228 (2013).
- 450 32. Ades, S. E., Connolly, L. E., Alba, B. M. & Gross, C. A. The *Escherichia coli* sigma(E)-  
451 dependent extracytoplasmic stress response is controlled by the regulated proteolysis of an  
452 anti-sigma factor. *Genes Dev.* **13**, 2449–2461 (1999).
- 453 33. Alba, B. M., Leeds, J. A., Onufryk, C., Lu, C. Z. & Gross, C. A. DegS and YaeL participate  
454 sequentially in the cleavage of RseA to activate the sigma(E)-dependent extracytoplasmic  
455 stress response. *Genes Dev.* **16**, 2156–2168 (2002).
- 456 34. Flynn, J. M., Levchenko, I., Sauer, R. T. & Baker, T. A. Modulating substrate choice: the  
457 SspB adaptor delivers a regulator of the extracytoplasmic-stress response to the AAA+  
458 protease ClpXP for degradation. *Genes Dev.* **18**, 2292–2301 (2004).
- 459 35. Zellmeier, S., Schumann, W. & Wiegert, T. Involvement of Clp protease activity in  
460 modulating the *Bacillus subtilis* sigma W stress response. *Mol. Microbiol.* **61**, 1569–1582  
461 (2006).
- 462 36. Bellier, A. & Mazodier, P. ClgR, a Novel Regulator of *clp* and *lon* expression in  
463 *Streptomyces*. *J. Bacteriol.* **186**, 3238–3248 (2004).
- 464 37. Bellier, A., Gominet, M. & Mazodier, P. Post-translational control of the *Streptomyces*  
465 *lividans* ClgR regulon by ClpP. *Microbiology* **152**, 1021–1027 (2006).
- 466 38. Mettert, E. L. & Kiley, P. J. ClpXP-dependent Proteolysis of FNR upon Loss of its O<sub>2</sub>-  
467 sensing [4Fe–4S] Cluster. *J. Mol. Biol.* **354**, 220–232 (2005).
- 468 39. Alkhalaf, L. M. & Ryan, K. S. Biosynthetic manipulation of tryptophan in bacteria: pathways  
469 and mechanisms. *Chem. Biol.* **22**, 317–328 (2015).
- 470 40. Palazzotto, E. *et al.* TrpM, a Small Protein Modulating Tryptophan Biosynthesis and  
471 Morpho-Physiological Differentiation in *Streptomyces coelicolor* A3(2). *PLoS ONE* **11**,  
472 e0163422–17 (2016).
- 473 41. Kieser, T., Bibb, M. J., Buttner, M. J., Chater, K. F. & Hopwood, D. A. Practical  
474 *Streptomyces* Genetics. John Innes Foundation (2000)
- 475 42. Seipke, R. F., Grünschow, S., Goss, R. J. M. & Hutchings, M. I. *Methods Enzymol.* **517**, 47–  
476 70 (2012).

- 477 43. Ramirez, F., Dundar, F., Diehl, S., Gruning, B. A. & Manke, T. deepTools: a flexible  
478 platform for exploring deep-sequencing data. *Nucleic Acids Res.* **42**, W187–W191 (2014).  
479 44. Fu, J. *et al.* Full-length RecE enhances linear-linear homologous recombination and  
480 facilitates direct cloning for bioprospecting. *Nat. Biotechnol.* **30**, 440–446 (2012).  
481 45. Myronovskyi, M. *et al.* Iterative marker excision system. *Appl. Microbiol. Biotechnol.* **98**,  
482 4557–4570 (2014).  
483 46. Wang, K. H., Sauer, R. T. & Baker, T. A. ClpS modulates but is not essential for bacterial N-  
484 end rule degradation. *Genes Dev.* **21**, 403–408.  
485 47. Neher, S. B., Sauer, R. T. & Baker, T. A. Distinct peptide signals in the UmuD and UmuD'  
486 subunits of UmuD/D' mediate tethering and substrate processing by the ClpXP protease.  
487 *Proc. Natl. Acad. Sci. USA.* **100**, 13219–13224 (2003).  
488 48. Kim, Y. I., Burton, R. E., Burton, B. M., Sauer, R. T. & Baker, T. A. Dynamics of substrate  
489 denaturation and translocation by the ClpXP degradation machine. *Mol. Cell* **5**, 639–648  
490 (2000).  
491 49. Seipke, R. F. *et al.* Draft genome sequence of *Streptomyces* strain S4, a symbiont of the leaf-  
492 cutting ant *Acromyrmex octospinosus*. *J. Bacteriol.* **193**, 4270–4271.
